# Supplementary material for: Environmental changes at the seafloor of the Faro drift (Gulf of Cadiz) during the transition from the Early to the Middle Pleistocene
Source: Copernicus journal article supplement (doi:10.5194/jm-45-117-2026), 2026-01-30
Supplement: Supplementary file 1 [file Supplementary Material 1 - S1.pdf › Supplementary Material 1 - S1.pdf]

Supplementary Material 1 – S1

**Figure S1:** (a)  $\delta^{18}\text{O}$  record from planktic foraminifera species *G. bulloides* at IODP Site U1387 (Voelker et al., 2025) with Marine Isotopic Stages and substages (Railsback et al., 2015; Mega et al., 2025); (b)  $\delta^{18}\text{O}$  record from planktic foraminifera species *G. bulloides* at IODP Site U1385 on its LR04 related age model (Hodell et al., 2023). Magenta arrows between (a) and (b) indicate tuning points between the two records; (c) sedimentation rates ( $\text{cm kyr}^{-1}$ ) for IODP Site U1387.

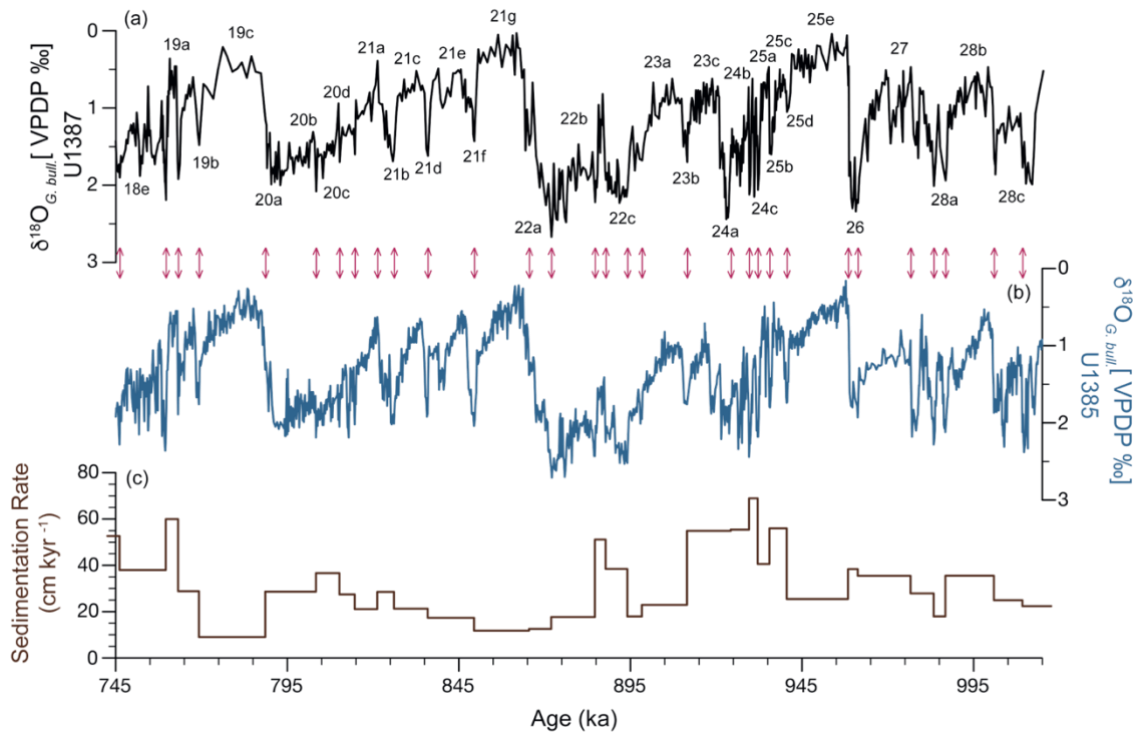

**Table S1: Results of Q- and R-mode Principal Component Analyses (PCA) of benthic foraminifera assemblages at IODP Site U1387.**

| Principal Component | Dominant Species                                             | Loading / Score | Significant Species                                                                                                             | Score / Loading          | Explained Variance (%) |
|---------------------|--------------------------------------------------------------|-----------------|---------------------------------------------------------------------------------------------------------------------------------|--------------------------|------------------------|
| <b>Q-mode PCA</b>   |                                                              |                 |                                                                                                                                 |                          |                        |
| 1                   | <i>Cassidulina laevigata</i>                                 | 7.4             | <i>Bulimina aculeata</i><br><i>Trifarina angulosa</i>                                                                           | 1.8<br>1.5               | 25.6                   |
| 2                   | <i>Hyalinea balthica</i><br><i>Cibicides pachyderma</i>      | 6.6<br>3        | <i>Sphaeroidina bulloides</i><br><i>Cassidulina laevigata</i>                                                                   | 1.6<br>1.5               | 19.6                   |
| 3                   | <i>Melonis affinis</i><br><i>Globocassidulina subglobosa</i> | 5.0<br>3.2      | <i>Trifarina angulosa</i><br><i>Bulimina aculeata</i><br><i>Bigenerina irregularis</i>                                          | 2.9<br>2.3<br>1.5        | 20.1                   |
| 4                   | <i>Uvigerina celtica</i>                                     | 7.3             | <i>Uvigerina celtica</i><br><i>Cibicides pachyderma</i>                                                                         | 1.1<br>1.3               | 13.4                   |
| <b>R-mode PCA</b>   |                                                              |                 |                                                                                                                                 |                          |                        |
| 1                   |                                                              |                 | <i>Nummoloculina irregularis</i><br><i>Gavelinopsis translucens</i><br><i>Trifarina angulosa</i><br><i>Quinqueloculina</i> spp. | 0.6<br>0.5<br>0.5<br>0.5 | 7.2                    |

|   |                                                          |       |     |
|---|----------------------------------------------------------|-------|-----|
|   | <i>Cibicides lobatulus</i>                               | 0.5   |     |
|   | <i>Pyrgo</i> spp.                                        | 0.4   |     |
|   | <i>Globocassidulina</i><br><i>subglobosa</i>             |       |     |
|   | <i>Bigenerina irregularis</i>                            | - 0.6 |     |
|   | <i>Bulimina striata</i> subsp.<br><i>mexicana</i>        | -0.4  |     |
| 2 | <i>Siphonina bradyana</i>                                | - 0.4 |     |
|   | <i>Melonis affinis</i>                                   | - 0.4 | 6.6 |
|   | <i>Lenticulina</i> spp.                                  | - 0.4 |     |
|   | <i>Pullenia bulloides</i>                                | - 0.4 |     |
|   | <i>Dentalina</i> spp.                                    | - 0.4 |     |
|   | <i>Sigmoilina</i> sp.                                    | - 0.4 |     |
|   | <i>Trifarina angulosa</i>                                | 0.4   |     |
| 3 | <i>Gyroidinoides</i><br><i>neosoldanii</i>               | 0.4   | 4.4 |
|   | <i>Uvigerina</i> sp2.                                    | 0.4   |     |
|   | <i>Sphaeroidina bulloides</i>                            | 0.4   |     |
| 4 | <i>Martinotina</i><br><i>communis</i>                    | 0.4   |     |
|   | <i>Cibicides mollis</i>                                  | 0.4   | 4.1 |
|   | <i>Cibicides pachyderma</i><br><i>Gyroidina umbonata</i> | 0.4   |     |

---

## References

Voelker, A. H. L., Mega, A., and Rodrigues, T.: Age model control points for the Marine Isotope Stage (MIS) 18 to MIS 28 interval of IODP Site 339-U1387, Gulf of Cadiz, <https://doi.org/10.1594/PANGAEA.974469>, 2025.

Hodell, D. A., Crowhurst, S. J., Lourens, L. J., Margari, V., Nicolson, J., Rolfe, J. E., Skinner, L. C., Thomas, N. C., Tzedakis, P. C., Mleneck-Vautravers, M. J., and Wolff, E. W.: Oxygen and carbon isotope data for the planktonic foraminifera *Globigerina bulloides* at IODP Site 339-U1385, <https://doi.org/10.1594/PANGAEA.951386>, 2023b.
