# Supplementary material for: Environmental changes at the seafloor of the Faro drift (Gulf of Cadiz) during the transition from the Early to the Middle Pleistocene
Source: Copernicus journal article supplement (doi:10.5194/jm-45-117-2026), 2026-01-30
Supplement: Supplementary file 1 [file Supplementary material 2 - S2.xlsx]

## Sheet: BF total relative abundance
Event	Sample label	SITE	HOLE	CORE	CORE_TYPE	SECTION	TOP_DEPTH [cm]	BOTTOM_DEPTH [cm]	MBSF_TOP [m]	MCD_TOP [m]	Corrected MCD_TOP [m]		age LR04 (Oct. 23; U1385 Hodell et al. 2023)		Anomalinoides colligera	Uvigerina celtica	Uvigerina peregrina	Uvigerina mediterranea	Globobulimina turgida	Globobulimina affinis	Bulimina striata mexicana	Bulimina acanthia	Bulimina aculeata	Bulimina elongata	Cibicides lobatulus	Cibicides mollis	Cibicides sp. aff. pseudoungerianus	Cibicides refulgens	Melonis affinis	Cibicides pachyderma	Planulina ariminensis	Hyalinea balthica	Discanomalina semipunctata	Discanomalina coronata	Pyrgo lucernula	Pyrgo murrhina	Pyrgo fornasinii	Pyrgo oblonga	Pyrgo spp.	Dentalina communis	Dentalina spp.	Sphaeroidina bulloides	Pullenia quinqueloba	Pullenia bulloides	Vulvulina pennatula	Martinottiella communis	Bigenerina irregularis	Sigmoilopsis woodi	Sigmoilopsis schlumbergeri
339-U1387A	339-U1387A-21X-2, 53-55	U1387	A	21	X	2	53	55	182.13	197.67	198.84		760.704		0	18.2875	0.46926	0.0340044	0	0	0.93852	0	0.972524	0	0.904516	0.979325	0	0	6.69886	8.90914	0.23803	13.5269	0	0	0.0340044	0	0	0	0	0	0.0680087	3.28482	0.46926	0.435256	0	0.0340044	1.88384	0.972524	1.50979
339-U1387A	339-U1387A-21X-2, 76-78	U1387	A	21	X	2	76	78	182.36	197.9	199.07		761.088		0.050226	28.0763	0	0	1.1552	0	1.75791	0	1.20542	0	0.100452	0.803616	1.05475	0	7.08187	6.83074	0.25113	13.6615	0	0	0.050226	0	0	0	0	0.150678	0	4.16876	0.853842	0	0	0	4.36966	0	2.3104
339-U1387A	339-U1387A-21X-2, 102-104	U1387	A	21	X	2	102	104	182.62	198.16	199.33		761.522		0.15413	21.5915	0.15413	0	1.31025	0	2.00456	0	4.00969	0	0.30826	1.5413	0	0	4.70371	11.5624	0.69373	13.7257	0	0	0	0	0	0	0	0	0	5.93617	0.38547	0	0	0.46239	11.5632	0	1.54159
339-U1387A	339-U1387A-21X-2, 127-129	U1387	A	21	X	2	127	129	182.87	198.41	199.58		761.939		0.218531	13.4615	0.393357	0	0.131119	0	2.27273	0	4.54545	0	0.786713	0.131119	1.70455	0	8.17308	6.20629	0.262238	17.5262	0	0	0	0	0	0	0	0.0874126	0.0437063	5.33217	0	0	0	0.0437063	6.99301	0.524476	1.26748
339-U1387A	339-U1387A-21X-3, 2-4	U1387	A	21	X	3	2	4	183.12	198.66	199.83		762.356		0	10.4918	2.09836	0	0.393443	0	6.42623	0	8.19672	0	2.09836	0.52459	0.786885	0	6.42623	4.98361	0.655738	8.45902	0	0	0	0	0	0	0	0.52459	0.0655738	3.86885	0	0	0	0	5.37705	0.983607	0.0655738
339-U1387A	339-U1387A-21X-3, 27-29	U1387	A	21	X	3	27	29	183.37	198.91	200.08		762.773		0.0571755	16.5237	0.457404	0	0.285878	0.0571755	1.42939	0	6.97541	0	1.71527	0.285878	3.08748	0	0.114351	4.97427	1.31504	12.8645	0	0	0	0.0571755	0	0	0	0.0571755	0	5.1458	0.0571755	0.114351	0.914808	0.114351	3.31618	0.114351	0.343053
339-U1387A	339-U1387A-21X-3, 52-54	U1387	A	21	X	3	52	54	183.62	199.16	200.33		763.19		0.094865	10.3981	0.18973	0	0.600495	0.56919	1.01126	0	4.29833	0	3.28707	3.38288	5.27829	0.853785	2.71788	2.62396	1.83374	14.4422	0.18973	0	0	0	0.094865	0	0	0	0	4.04599	1.01126	0.284595	0.094865	0	0.56919	0.474325	1.48559
339-U1387A	339-U1387A-21X-3, 65-67	U1387	A	21	X	3	65	67	183.75	199.29	200.46		763.641		0	9.05141	0.144823	0	0.144823	0.25344	2.31716	0	7.89283	0	0.362056	2.82404	3.40333	0.289645	5.28602	4.16365	2.46198	12.0203	0.144823	0	0	0	0	0	0	0	0	5.50326	1.9551	0.868936	1.23099	0.0724113	1.44823	0.144823	1.3034
339-U1387A	339-U1387A-21X-3, 74-76	U1387	A	21	X	3	74	76	183.84	199.38	200.55		763.953		0.175323	9.90576	0.394477	0.745124	0.788955	0.328731	3.19965	0.0438308	7.05676	0	0	0.788955	3.90094	0.0438308	2.23537	3.33114	0.52597	11.6152	0	0	0	0	0	0.0438308	0	0	0.350647	6.18014	1.40259	0	0.0438308	0.394477	2.58602	0.219154	0.394477
339-U1387A	339-U1387A-21X-3, 89-91	U1387	A	21	X	3	89	91	183.99	199.53	200.7		764.473		0.45854	11.2342	0.611387	0.305694	0.22927	0.152847	1.37562	0	2.90409	0	1.14635	1.75774	1.06993	0	5.73175	8.13909	3.51548	9.32365	0	0	0	0.152847	0	0	0	0.0764234	0.0764234	8.94154	0.611387	0.68781	1.22277	0.45854	3.43905	1.98701	0
339-U1387A	339-U1387A-21X-3, 101-103	U1387	A	21	X	3	101	103	184.11	199.65	200.82		764.89		0	13.8176	0.71062	0	0.315831	0.434268	0.868535	0.0789578	3.15831	0	0.236873	0.552704	1.89499	0	6.71141	2.72404	0.513225	17.6865	0	0	0	0.236873	0.631662	0.0789578	0	0.631662	0.0789578	5.44809	1.26332	0.631662	0.236873	0.157916	4.34268	0.71062	0
339-U1387A	339-U1387A-21X-3, 115,5-117,5	U1387	A	21	X	3	115.5	117.5	184.255	199.795	200.965		765.41		0	22.2869	0.105876	0.582319	0.0529381	0.423504	1.00582	0.0529381	5.50556	0	0.899947	1.1117	0.899947	0	7.14664	2.06458	1.85283	14.0286	0	0	0	0	0	0	0	0	0.476443	4.18211	0.847009	2.11752	0	0.158814	3.12335	4.12917	0
339-U1387A	339-U1387A-21X-3, 126-128	U1387	A	21	X	3	126	128	184.36	199.9	201.07		765.757		0.141193	13.5545	0.21179	0	0.81186	0.776562	1.69432	0	4.1652	0	0.141193	0.988352	0.635369	0.0705965	6.35369	2.89446	3.52983	10.0953	0	0	0	0	0	0.564772	0	1.12954	0	5.78892	0.776562	0	0.21179	0.141193	5.78892	0	5.15355
339-U1387A	339-U1387A-21X-4, 2-4	U1387	A	21	X	4	2	4	184.62	200.16	201.33		766.659		0.0775494	18.8057	0.193874	0	0	0.232648	1.97751	0	4.38154	0	0.697945	0.426522	0.155099	0.155099	3.72237	2.71423	2.28771	11.7875	0	0	0	0	0	0.0387747	0	0.697945	0.0387747	6.01008	1.27957	0	0.73672	0.193874	5.04071	3.25708	0.0387747
339-U1387A	339-U1387A-21X-4, 25-27	U1387	A	21	X	4	25	27	184.85	200.39	201.56		767.456		0.305998	7.34394	0.367197	0.550796	0.550796	0.183599	3.48837	0	6.11995	0	2.14198	1.04039	0.856793	0.122399	12.3011	6.67075	6.48715	13.8923	0.122399	0	0	0.0611995	0	0	0	0.0611995	0.0611995	2.57038	1.46879	0.0611995	0.183599	0.244798	2.87638	1.71359	0.673195
339-U1387A	339-U1387A-21X-4, 52-54	U1387	A	21	X	4	52	54	185.12	200.66	201.83		768.393		0.283589	10.4912	0.992561	0	0.141794	0.283589	2.26836	7.46672	0	0	0.141794	1.51241	1.98494	0	6.23807	7.9871	5.24622	9.07343	0	0	0	0	0	0	0	0.141794	0.378059	2.45747	0.897913	0	0.283589	0.567178	4.15901	1.22883	2.07942
339-U1387A	339-U1387A-21X-4, 77-79	U1387	A	21	X	4	77	79	185.37	200.91	202.08		769.26		0.0508388	5.38892	0.406711	0	0	0	1.62684	0	4.47382	0	1.88104	0.559227	1.42349	0.508388	2.4911	2.33859	1.88104	6.91408	0	0	0	0	0	0	0	0.0508388	0	1.01678	0.101678	3.25369	0.203355	0.101678	1.32181	2.18607	1.67768
339-U1387A	339-U1387A-21X-4, 88-90	U1387	A	21	X	4	88	90	185.48	201.02	202.19		770.481		0.082189	7.89014	0.287661	0	0	0	5.73953	0	0.999966	0	0.479436	0.082189	2.76703	0	9.6572	3.97247	3.04442	9.20516	0	0	0	0	0	0	0	0.479436	0.917777	0.602719	0	0.876682	0.123283	0.643814	5.60255	3.34235	0.958871
339-U1387A	339-U1387A-21X-4, 96-98	U1387	A	21	X	4	96	98	185.56	201.1	202.27		771.369		0.12132	6.55539	0	0	0.364188	0.364188	4.00607	0	4.00607	0	0	0.364188	1.82094	0	10.9257	3.64188	1.18361	12.7466	0	0	0	0	0	0	0	0.364188	1.45675	4.00607	0.364188	2.54932	0	0	4.73445	4.00607	3.2777
339-U1387A	339-U1387A-21X-4, 114-116	U1387	A	21	X	4	114	116	185.74	201.28	202.45		773.366		0.716076	11.672	0.0716076	1.14572	0	0	2.8643	1.21733	1.71858	0	0.214823	0	1.50376	0	9.73863	7.84103	3.93842	15.6821	0	0	0	0	0	0	0	0.143215	4.01003	4.51128	0.0716076	1.14572	0	0.0716076	6.01504	3.65199	1.43215
339-U1387A	339-U1387A-21X-4, 126-128	U1387	A	21	X	4	126	128	185.86	201.4	202.57		774.698		0.141791	11.3703	0.0472635	0	0	0	0	0	3.50603	0	0	0.189054	2.55792	0	3.4115	8.94702	1.60909	20.469	0	0	0	0	0	0	0	0	3.4115	6.20431	0.0472635	1.70575	0	0	7.91006	0.472635	1.94207
339-U1387A	339-U1387A-21X-4, 139-141	U1387	A	21	X	4	139	141	185.99	201.53	202.7		776.141		0.111638	12.2244	0.111638	1.78621	0	0	1.33966	0.111638	4.0748	0	0.446553	0	0	0.66983	10.494	8.12169	2.56768	15.741	0	0	0	0	0	0	0	0	5.35864	6.64248	0.446553	2.67932	0	0.279096	4.24226	2.00949	0.948925
339-U1387A	339-U1387A-21X-5, 0-2	U1387	A	21	X	5	0	2	186.1	201.64	202.81		777.361		0	7.22559	0	0	0	0	0.551572	0	4.41258	0	0.110314	0	1.26862	0	8.27358	7.99779	4.02648	26.5858	0	0	0	0	0	0	0	0	3.30943	7.72201	0	1.10314	0	0.110314	7.00496	1.26862	0.0551572
339-U1387A	339-U1387A-21X-5, 14-16	U1387	A	21	X	5	14	16	186.24	201.78	202.95		778.915		0	7.87811	0	0	0	0	0	0	4.31067	0	0.0743218	0.148644	0.0743218	0	5.94575	14.1583	3.4188	24.3776	0	0	0	0	0	0	0	0	2.97287	8.02676	0	2.45262	0	0	2.67559	1.56076	1.78372
339-U1387A	339-U1387A-21X-5, 27-29	U1387	A	21	X	5	27	29	186.37	201.91	203.08		780.358		0	6.06709	0	0	0.356783	0.178391	0	1.42758	0	0	0.178391	0.267587	9.18984	0	3.12274	5.35174	1.59081	14.7516	0	0	0	0	0	0	0	0.565055	1.90344	8.05928	0	1.42758	0	0.0891957	9.63537	2.17102	1.90344
339-U1387A	339-U1387A-21X-5, 39-41	U1387	A	21	X	5	39	41	186.49	202.03	203.2		781.689		0	4.20792	0	0.0618812	0.49505	0	0	0.0618812	4.45545	0	0.990099	0	0	0	7.17822	12.3762	0.618812	15.9653	0	0	0	0	0	0	0	0	5.44554	8.78713	0	0	0	0.123762	13.8614	3.09406	1.79455
339-U1387A	339-U1387A-21X-5, 52-54	U1387	A	21	X	5	52	54	186.62	202.16	203.33		783.132		0.0745767	2.76606	0	0	0.0745767	0	2.24291	0.0745767	4.48581	0	1.64405	0	0.522037	0	7.47561	11.1287	2.8384	16.1489	0	0	0	0	0	0.0745767	0	0	3.58865	6.12538	0	1.42032	0	0	13.5264	1.49378	2.09263
339-U1387A	339-U1387A-21X-5, 64-66	U1387	A	21	X	5	64	66	186.74	202.28	203.45		784.464		0	7.02245	0	1.37426	0.0761567	0	3.66468	0.458085	5.57318	0	1.67888	0.0761567	0.45694	0	5.34356	12.3798	4.57513	13.3606	0	0	0	0	0	0	0	0	4.58085	5.79936	0	1.37426	0	0	11.6737	1.21965	0.304627
339-U1387A	339-U1387A-21X-5, 75-77	U1387	A	21	X	5	75	77	186.85	202.39	203.56		785.685		0	10.2986	0	0	0	0	1.73641	0	11.6903	0	2.08369	0	0.288677	0	7.63931	4.74125	0.708887	13.1967	0	0	0	0	0	0	0	0	6.94562	7.80818	0	1.04184	0	0	7.74958	2.02508	3.00919
339-U1387A	339-U1387A-21X-5, 89-91	U1387	A	21	X	5	89	91	186.99	202.53	203.7		787.238		0	8.14472	0	0	0	0	4.94335	0.533631	19.661	0	0.336941	0	0.0842354	0	11.3751	5.8552	0.589647	4.94335	0	0	0	0	0	0	0	0	4.57819	3.79143	0	2.24698	0	0	13.0034	0.786337	3.90389
339-U1387A	339-U1387A-21X-5, 101-103	U1387	A	21	X	5	101	103	187.11	202.65	203.82		788.57		0	6.0198	0	0	0	0.0492334	2.36912	0	14.4117	0	0.592281	0.1477	0.0984667	0.0492334	10.3149	5.37532	1.50513	1.87531	0	0	0	0	0	0	0	0	4.14597	6.56136	1.77684	5.33053	0	0.0984667	10.6566	2.21994	1.92454
339-U1387B	339-U1387B-21X-1, 12-14	U1387	B	21	X	1	12	14	185.52	202.73	203.9		788.849		0.0236518	6.55156	0.780511	0.402081	0.0118259	0.0473037	1.15894	0.0473037	13.4106	0	0.827815	0.0236518	2.24693	0.118259	11.3292	1.72658	2.8737	0.37843	0.0473037	0.0236518	0.0709555	0	0	0	0	0	0	2.57805	0.37843	0.37843	0	0	4.49385	0.875118	1.25355
339-U1387A	339-U1387A-21X-5, 114-116	U1387	A	21	X	5	114	116	187.24	202.78	203.95		789.024		0.178731	8.79357	0.0714924	0	0.607685	0.0357462	0	0.178731	5.71939	0	1.25112	0.607685	1.89455	0.178731	7.57819	0.80429	0.643432	6.36282	0	0.0357462	0	0.142985	0.0357462	2.43074	0.0357462	0	0	2.75246	0.0714924	1.14388	0.0357462	0.0357462	5.79088	0.500447	3.10992
339-U1387B	339-U1387B-21X-1, 25-27	U1387	B	21	X	1	25	27	185.65	202.86	204.03		789.303		0.0837784	2.97413	0.418892	0.167557	0.0418892	0.0523615	0	0	12.1479	0	1.5499	0.167557	0.251335	0.293224	11.6033	3.97947	3.51869	1.46612	0	0	0.0837784	0	0	0	0	0	0	1.42423	0.335114	0	0	0	1.1729	0.125668	3.43491
339-U1387A	339-U1387A-21X-5, 125-127	U1387	A	21	X	5	125	127	187.35	202.89	204.06		789.408		0	6.30967	0.124533	0	0.041511	0.083022	0.664176	0	13.4911	0	0.332088	0.41511	0.622665	0.332088	10.3362	6.47572	1.82648	0	0	0	0.083022	0.041511	0	0	0	0	0	0.249066	0.664176	0	0	0	2.11706	0.166044	1.45289
339-U1387B	339-U1387B-21X-1, 38-40	U1387	B	21	X	1	38	40	185.78	202.99	204.16		789.757		0.0531632	3.34928	0.0531632	0	0.0531632	0.279107	0	0.0531632	12.5997	0	2.55183	0.0531632	0.903775	1.0101	16.4806	6.10048	1.38224	0.691122	0	0	0	0	0.0531632	0	0	0	0	0.318979	0.425306	0.531632	0	0	0.956938	1.16959	1.06326
339-U1387A	339-U1387A-21X-5, 136,5-138,5	U1387	A	21	X	5	136.5	138.5	187.465	203.005	204.175		789.827		0	7.66749	0.0759157	0	0.113874	0.151831	1.29057	0	11.9947	0	0.151831	0.227747	2.73297	0.0379579	5.0484	1.0818	1.74606	2.4293	0.0379579	0.0379579	0.645284	0.0379579	0	0.0759157	0	0	0	0	0	0.683242	0	0.0379579	0.948947	1.51831	1.36648
339-U1387B	339-U1387B-21X-1, 52-54	U1387	B	21	X	1	52	54	185.92	203.13	204.3		790.246		0	4.30059	0.134394	0	0	0.167992	0.0447978	0	11.2891	0	0.537574	0.223989	0.492776	0.0895957	6.09251	3.60623	0.940755	2.86706	0	0	0	0	0.0447978	0.0447978	0	0	0	1.29914	0	0.761563	0.0895957	0.0895957	2.91186	1.88151	1.03035
339-U1387A	339-U1387A-21X-6, 2-4	U1387	A	21	X	6	2	4	187.62	203.16	204.33		790.351		0.230061	0.920245	10.1227	0	0	0.996933	0.613497	0.690184	7.59202	0	1.99387	0	3.29755	0.230061	4.44785	0.843558	0.996933	3.98773	0.153374	0.0766871	0.153374	0.0766871	0	0	0	0	0	1.15031	0	0.0766871	0	0	6.82515	0.613497	0.996933
339-U1387B	339-U1387B-21X-1, 65-67	U1387	B	21	X	1	65	67	186.05	203.26	204.43		790.7		0.126984	3.42857	0	0.0634921	0	0.15873	0	0.0634921	8.19048	0	0	0.190476	0.634921	0	7.68254	3.90476	0.507937	5.20635	0.190476	0.0634921	0	0.0634921	0.126984	0	0	0	0	1.5873	0.0634921	0	0.507937	0	4.12698	1.07937	0.698413
339-U1387B	339-U1387B-21X-1, 77-79	U1387	B	21	X	1	77	79	186.17	203.38	204.55		791.119		0	4.8972	0.0373832	0	0	0.766355	0	0.261682	7.3271	0.598131	0.0747664	0.0373832	1.1215	0.11215	6.09346	6.82243	0.448598	4.8972	0.11215	0	0	0	0.11215	0	0	0	0	2.65421	0	0	0	0	6.16822	0.299065	1.34579
339-U1387A	339-U1387A-21X-6, 27-29	U1387	A	21	X	6	27	29	187.87	203.41	204.58		791.224		0.0568828	6.65529	0.0568828	0	0	0.170648	0.455063	0	3.86803	0	0.910125	0.625711	0.967008	0.170648	6.65529	0.227531	1.02389	1.93402	0	0	0.227531	0	0.170648	0.227531	0	0	0.227531	2.73038	0.284414	0.0568828	0.0568828	0	4.37998	2.67349	0.511945
339-U1387B	339-U1387B-21X-1, 89-91	U1387	B	21	X	1	89	91	186.29	203.5	204.67		791.538		0.382848	8.42266	0	0	0	0.153139	0.612557	0.842266	4.90046	0.612557	0.689127	0.382848	1.45482	0.229709	6.43185	0.995406	0.229709	4.51761	0	0	0.0765697	0	0.153139	0	0	0	1.22511	4.44104	2.45023	0.0765697	0	0	4.74732	2.22052	0.229709
339-U1387B	339-U1387B-21X-1, 102-104	U1387	B	21	X	1	102	104	186.42	203.63	204.8		791.992		0.612131	13.133	0	0	0	0.166945	0	0.111297	5.00835	0	1.05732	0.389538	2.55982	0.0556483	6.51085	0.834725	0.556483	2.28158	0	0	0	0	0.500835	0.445186	0	0	0	4.22927	0.445186	0.556483	0	0	5.62048	3.17195	0.166945
339-U1387B	339-U1387B-21X-1, 114-116	U1387	B	21	X	1	114	116	186.54	203.75	204.92		792.411		0.0549904	5.33407	0.549904	0.934836	0	0.494913	0.439923	1.1548	6.76382	0	1.81468	0.0549904	1.75969	0	4.45422	1.23728	1.7047	2.96948	0	0	0.0549904	0	0.0549904	0	0	0	0.439923	2.58455	0.879846	0.439923	0	0	6.76382	0.824856	1.1548
339-U1387B	339-U1387B-21X-1, 127-129	U1387	B	21	X	1	127	129	186.67	203.88	205.05		792.865		0.338696	8.29805	0.225797	0.508044	0	0.564493	0	0.451595	3.33051	0	0.508044	0.395145	1.18544	0.225797	10.048	2.73779	2.08863	3.33051	0	0.169348	0	0.169348	0.282247	0	0	0	0	2.25797	0	0	0	0	3.895	1.07254	0.395145
339-U1387B	339-U1387B-21X-2, 2-4	U1387	B	21	X	2	2	4	186.92	204.13	205.3		793.738		0.796236	12.4502	0.28954	0	0	0.361925	0	0.0723851	4.05356	0	0.651466	0.941006	1.4477	0.14477	5.79081	0.941006	0.977199	4.77742	0.28954	0	0	0	0.14477	0	0	0	0	4.48788	0.579081	0.579081	0	0	6.22512	3.18494	0.14477
339-U1387B	339-U1387B-21X-2, 14-16	U1387	B	21	X	2	14	16	187.04	204.25	205.42		794.157		0.239449	9.63783	0.0598623	0.0598623	0	0.239449	0	0.598623	9.2188	0.478899	0.179587	0	0.299312	0	4.1305	0.957797	1.58635	2.63394	0.0598623	0.0598623	0	0	0.598623	0	0	0	0	1.31697	0	0.957797	0	0	2.81353	4.25022	0
339-U1387B	339-U1387B-21X-2, 27-29	U1387	B	21	X	2	27	29	187.17	204.38	205.55		794.611		0.386997	3.94737	0.386997	0.386997	0.696594	0.928793	0.309598	0.154799	4.72136	0	0.619195	0.928793	2.24458	0.154799	7.27554	1.39319	2.39938	2.47678	0	0.0773994	0	0	0	0	0.386997	0	0.309598	3.71517	0	0.773994	0	0.0773994	4.87616	2.78638	0.773994
339-U1387B	339-U1387B-21X-2, 52-54	U1387	B	21	X	2	52	54	187.42	204.63	205.8		795.484		0.547945	9.45205	0.753425	0.616438	0.684932	1.71233	0	0.342466	1.78082	0	1.64384	0.616438	2.73973	0.0684932	10.0685	1.23288	3.0137	4.86301	0	0	0	0.616438	0	0	0	0	0	6.84932	0.616438	1.09589	0	0.0684932	6.78082	5.68493	0
339-U1387B	339-U1387B-21X-2, 77-79	U1387	B	21	X	2	77	79	187.67	204.88	206.05		796.357		0.0744602	12.3604	0.0744602	0	0.0744602	0.22338	0	1.41474	4.16977	0	0	0.446761	1.63812	0.14892	10.201	3.42517	3.27625	4.91437	0	0	0	0.14892	0	0.0744602	0	0	0	3.42517	0.670141	0.670141	0	0	6.10573	0.521221	1.34028
339-U1387B	339-U1387B-21X-2, 102-104	U1387	B	21	X	2	102	104	187.92	205.13	206.3		797.229		0.466636	10.0793	0.0466636	0.373308	0	0.0933271	0.373308	1.5399	2.75315	0	2.00653	0.699953	1.25992	0.279981	5.5063	1.77322	1.67989	6.11293	0	0	0.419972	0.0466636	0	0	0	0	0.373308	3.77975	0	0.373308	0	0.0466636	6.29958	3.03313	0.139991
339-U1387B	339-U1387B-21X-2, 127-129	U1387	B	21	X	2	127	129	188.17	205.38	206.55		798.102		0.218245	11.6979	0.436491	0	0	0.174596	0	0.305543	3.62287	0	1.39677	0.523789	2.57529	0.523789	7.42034	1.26582	1.17852	7.15845	0	0.0436491	0	0.0436491	0.130947	0	0	0	0	2.61894	0.436491	0.742034	0.0436491	0	9.77739	4.6268	0.829332
339-U1387B	339-U1387B-21X-3, 1-3	U1387	B	21	X	3	1	3	188.41	205.62	206.79		798.94		0.469484	7.74648	0.117371	0	0	0.234742	0.234742	0.0586854	1.64319	0	0.528169	0.762911	4.16667	0.117371	5.45775	1.81925	1.70188	7.92254	0	0	0.293427	0	0	0	0	0	0	3.81455	0.469484	0.938967	0	0	4.22535	5.69249	0.469484
339-U1387B	339-U1387B-21X-3, 25-27	U1387	B	21	X	3	25	27	188.65	205.86	207.03		799.778		0.598802	5.62874	0.299401	0.718563	0.538922	0.0598802	0.479042	0.239521	3.11377	0.0598802	1.37725	0.538922	1.67665	0.11976	7.06587	1.85629	1.01796	6.58683	0	0.0598802	0.179641	0.0598802	0.239521	0	0.538922	0	0	4.13174	0	0.718563	0.239521	0	7.54491	3.83234	0.0598802
339-U1387B	339-U1387B-21X-3, 51-53	U1387	B	21	X	3	51	53	188.91	206.12	207.29		800.686		0.415628	19.4514	0	0.0831255	0.166251	0.166251	0.997506	0.0831255	2.74314	0	0.914381	0.665004	1.74564	0.166251	7.64755	1.82876	0.831255	6.56692	0.0831255	0.0831255	0.415628	0	0	0	0	0.0831255	0	1.33001	0.166251	0.0831255	0.0831255	0	9.97506	2.66002	0.0831255
339-U1387B	339-U1387B-21X-3, 76-78	U1387	B	21	X	3	76	78	189.16	206.37	207.54		801.559		0.207361	7.10213	0	0	0.103681	0.103681	1.24417	0.466563	4.66563	0	0.414723	0.777605	2.74754	0.259202	8.6055	1.96993	1.34785	4.87299	0	0	0	0	0	0	0.829445	0	0	5.02851	0	1.65889	0	0	5.39139	2.79938	0.155521
339-U1387B	339-U1387B-21X-3, 101-103	U1387	B	21	X	3	101	103	189.41	206.62	207.79		802.432		0	9.23567	0	0	0.477707	0	0.636943	0.955414	1.91083	0	0	0.477707	1.91083	0.159236	5.57325	9.23567	0	11.465	0	0	0	0	0	0	0	0	0.318471	3.50318	0.318471	0	0.159236	0	6.36943	0	3.02548
339-U1387B	339-U1387B-21X-3, 127-129	U1387	B	21	X	3	127	129	189.67	206.88	208.05		803.34		0.202224	7.28008	0.0505561	0	0.0505561	0.707786	0	0	1.6178	0	2.17391	0.202224	0.505561	0.505561	4.34783	1.2639	0.455005	6.16785	0	0.202224	0	0	0.151668	0	0	0	0	3.03337	1.36502	0	0	0	5.00506	0.151668	1.06168
339-U1387B	339-U1387B-21X-4, 2-4	U1387	B	21	X	4	2	4	189.92	207.13	208.3		804.022		0.453926	2.36042	0.0907853	0	0	0.272356	0	0.544712	1.81571	0	2.17885	0.817068	0.544712	0.453926	6.53654	1.45256	1.49796	7.08125	0.590104	0	0	0	0	0	0	0	0.363141	3.35906	1.8611	0.363141	0	0	2.95052	1.58874	3.6768
339-U1387B	339-U1387B-21X-4, 27-29	U1387	B	21	X	4	27	29	190.17	207.38	208.55		804.705		0.31348	6.34796	0	0.31348	0.39185	0	0.31348	1.01881	3.44828	0	1.05799	0.587774	0.940439	0.23511	7.79781	1.25392	0.979624	12.1473	0.117555	0	0	0	0.039185	0	0	0	0	4.07524	0.666144	0	0	0	6.07367	0.548589	1.13636
339-U1387B	339-U1387B-21X-4, 49-51	U1387	B	21	X	4	49	51	190.39	207.6	208.77		805.305		0.34904	5.84642	0	0	0.61082	0	0	0.78534	1.04712	0	0.17452	0.26178	0.69808	0.17452	7.76614	1.39616	1.39616	7.67888	0.08726	0	0	0	0	0	0	0	0	6.89354	0.34904	1.7452	0.34904	0	5.6719	1.04712	0.78534
339-U1387B	339-U1387B-21X-4, 75-77	U1387	B	21	X	4	75	77	190.65	207.86	209.03		806.015		0.502548	6.14225	0.0558386	0.0558386	0.0558386	0.558386	0	1.4518	2.34522	0	0.670064	0.725902	2.84777	0.0558386	6.58896	0.223355	1.72402	4.9138	0	0.111677	0	0.111677	0	0	0	0.279193	0	4.41125	0.335032	0.558386	0	0	6.25393	3.46199	0.670064
339-U1387B	339-U1387B-21X-4, 95-97	U1387	B	21	X	4	95	97	190.85	208.06	209.23		806.56		0.0259067	5	0	0	0	0.0259067	0	0.0777202	5.41451	0	0.880829	0.0777202	1.96891	0.0518135	7.97927	2.20207	0.673575	9.14508	0.0777202	0	0	0.0259067	0	0	0	0	0	2.61658	0	0	0	0.0259067	2.90155	1.37306	0
339-U1387B	339-U1387B-21X-4, 125-127	U1387	B	21	X	4	125	127	191.15	208.36	209.53		807.379		0.35231	7.59321	0.117437	0	0	0.117437	0	0.882541	5.06214	0	0.117437	1.64676	2.64762	0.763339	11.2426	1.35229	1.60217	7.8868	0.293592	0	0	0.411911	0.0587184	0	0.353193	0.0587184	0.353193	4.46966	0.353193	0.353193	0	0.411028	3.35224	2.05867	0.117437
339-U1387B	339-U1387B-21X-5, 2-4	U1387	B	21	X	5	2	4	191.42	208.63	209.8		808.116		0.250896	13.4409	0.0358423	0	0.0716846	0.0716846	0	2.47312	1.79211	0	0.107527	0.215054	4.19355	0.0716846	11.7563	1.79211	0.0716846	9.03226	0	0	0	0	0	0	0	0.573477	0	2.86738	0	1.72043	0.573477	0.107527	2.32975	1.93548	1.21864
339-U1387B	339-U1387B-21X-5, 26-28	U1387	B	21	X	5	26	28	191.66	208.87	210.04		808.771		0.0490316	2.89287	0	2.20642	0.0490316	0	1.17676	2.86835	8.62957	0	0.858053	0.0245158	1.83869	0	11.6205	1.96127	0.0735474	9.09537	0.0245158	0	0	0	0	0	0	0	0.392253	2.84383	0.0245158	0	0.0245158	0.0245158	1.74062	0.784506	0
339-U1387B	339-U1387B-21X-5, 49-51	U1387	B	21	X	5	49	51	191.89	209.1	210.27		809.399		0.148258	13.232	0.0370645	0	1.33432	0.0370645	0.0370645	2.55745	6.56042	0	2.03855	0.926612	1.40845	0	12.6761	1.74203	0.074129	15.9007	0	0	0	0	0	0	0	0.0370645	0	2.92809	0	0.593032	0	0.0370645	3.37287	1.37139	0.704225
339-U1387B	339-U1387B-21X-5, 78-80	U1387	B	21	X	5	78	80	192.18	209.39	210.56		810.19		0.896861	4.26009	1.19581	0	0	0.0747384	1.19581	0.224215	4.26009	0	2.39163	0.672646	1.19581	0.44843	17.4141	2.31689	1.27055	7.24963	0.149477	0	0	0	0.747384	0.0747384	0	0	0	0.373692	0.672646	0	0	0.298954	1.49477	1.79372	0.149477
339-U1387B	339-U1387B-21X-5, 88-90	U1387	B	21	X	5	88	90	192.28	209.49	210.66		810.555		0	7.89154	0.0404694	0.687981	0	0.0404694	1.29502	0.202347	5.86807	1.29502	1.4569	0.161878	0.485633	0	13.6787	2.54958	0.768919	7.60826	0	0	0	0.0809389	0	0	0	0	0	0.930797	0	0.0404694	0.0404694	0	0.647511	1.29502	0.121408
339-U1387B	339-U1387B-21X-5, 99,5-101,5	U1387	B	21	X	5	99.5	101.5	192.395	209.605	210.775		810.992		0.125707	11.3136	2.07417	0	0.125707	0	0.502828	4.27404	6.53677	0	1.69705	0.251414	2.95412	0	18.9818	4.08548	0.502828	7.85669	0	0	0	0.502828	0	0.0628536	0	0	0	2.51414	1.00566	0	0	0	2.01131	1.88561	0.565682
339-U1387B	339-U1387B-21X-5, 113-115	U1387	B	21	X	5	113	115	192.53	209.74	210.91		811.467		0	12.1245	0.0216123	0.0216123	0.0648368	0	0	0.324184	5.90015	0	1.10223	0.237735	1.29674	0.0216123	23.6654	1.83704	0.713205	7.67236	0	0	0	0	0	0	0	0	0	3.09056	0.345796	0.345796	0.345796	0	1.83704	1.81543	0.75643
339-U1387B	339-U1387B-21X-5, 128-130	U1387	B	21	X	5	128	130	192.68	209.89	211.06		812.014		0.0447628	15.7565	0.179051	0	0.0447628	0.0447628	0	0.358102	0.0447628	0	0.402865	0.179051	2.19338	0.0895255	20.2775	3.31244	1.34288	7.34109	0.0447628	0	0.0447628	0	0	0	0	0	0	5.72963	0.358102	0.358102	0.358102	0	1.52193	0.671441	2.37243
339-U1387B	339-U1387B-21X-6, 4-6	U1387	B	21	X	6	4	6	192.94	210.15	211.32		812.962		0.135639	17.4975	0	0	0.542557	0	0	0.881655	7.66361	0	1.08511	0.440827	0.746016	0.0678196	22.1431	2.88233	0.169549	6.68023	0	0	0	0.0339098	0	0	0	0	0	1.69549	0.542557	0	0.0339098	0	1.45812	1.89895	0.610376
339-U1387B	339-U1387B-21X-6, 18-20	U1387	B	21	X	6	18	20	193.08	210.29	211.46		813.473		0.0927931	13.9499	0	0	0.0927931	0	0	1.63934	7.45438	0	0	0.123724	2.81472	0	21.6517	1.60841	0.185586	7.02134	0	0	0	0.494896	0.030931	0	0	0	0.494896	3.92824	1.02072	0	0	1.02072	1.82493	0	0.123724
339-U1387B	339-U1387B-21X-6, 27-29	U1387	B	21	X	6	27	29	193.17	210.38	211.55		813.801		0.267023	2.51764	0	0	1.25882	0	0	0.152584	4.3868	0	0.953652	0.0762922	1.25882	0.228877	20.637	3.08983	2.30784	10.9098	0.19073	0	0	0.0381461	0.0381461	0	0	0	0.0762922	1.83101	0	0	0	0.152584	0.724776	3.58573	2.63208
339-U1387B	339-U1387B-21X-6, 50-52	U1387	B	21	X	6	50	52	193.4	210.61	211.78		814.64		0.0772798	3.74807	0.0386399	5.06182	0.11592	0.0772798	0	0.193199	8.77125	0.618238	2.58887	0.0386399	1.66151	0.11592	10.3941	1.58423	0.11592	11.3601	0.0386399	0	0	0	0	0	0	0.11592	0	4.55951	0.656878	0	0	0.15456	4.36631	0.888717	0
339-U1387A	339-U1387A-22X-2, 6-8	U1387	A	22	X	2	6	8	190.08	209.28	211.84		814.924		0.04363	13.3072	1.04712	0	0.08726	0.21815	0	0	2.83595	0	1.43979	0.26178	0.91623	0.74171	14.267	3.44677	1.96335	8.55148	0.04363	0	0	0	0	0	0	0	0	5.2356	0.69808	0	0.69808	0.04363	4.53752	0.04363	0.04363
339-U1387A	339-U1387A-22X-2, 30-32	U1387	A	22	X	2	30	32	190.32	209.52	212.08		816.062		0.0389408	5.06231	1.36293	0.0389408	0.623053	0.155763	0	0	2.68692	0	4.20561	0.428349	1.12928	0.0778816	12.7336	4.24455	1.75234	15.148	0.116822	0	0	0.0389408	0.0389408	0	0	0	0.116822	1.55763	1.9081	0.623053	0.116822	0	1.51869	1.01246	0.155763
339-U1387A	339-U1387A-22X-2, 52-54	U1387	A	22	X	2	52	54	190.54	207.75	212.3		817.105		0.588102	8.18819	1.1762	0.588102	0.0904773	0	0	0.226193	8.73106	0	0	0.31667	2.26193	0.814295	11.6716	2.66908	1.10835	12.7573	0	0	0	0	0	0	0	0	0	5.47387	1.31192	0	0.0452386	0.0452386	3.61909	3.61909	2.8048
339-U1387A	339-U1387A-22X-2, 78-80	U1387	A	22	X	2	78	80	190.8	210	212.56		818.338		0	8.23215	2.0992	0	0.329286	0	0.329286	0	7.28545	0.370447	1.48179	0.164643	1.68759	0.0823215	12.2659	2.05804	2.11978	12.6363	0	0	0	0.0411607	0	0.0411607	0	0	0.329286	1.56411	0.0411607	0	0	0.0411607	1.85223	0.246964	1.23482
339-U1387A	339-U1387A-22X-2, 101-103	U1387	A	22	X	2	101	103	191.03	210.23	212.79		819.428		0.00699484	5.37204	0.902335	1.79068	0.012241	0.00699484	0.89534	0.0279794	7.61039	0	1.357	0.00699484	1.44793	0.0139897	17.634	1.24508	1.64729	6.27437	0	0	0	0	0	0	0	0.44767	0	0.510623	0	0	0	0	5.06427	0.496634	2.28731
339-U1387A	339-U1387A-22X-2, 127-129	U1387	A	22	X	2	127	129	191.29	210.49	213.05		820.661		0.438116	7.00986	0.547645	0	0.0547645	0.0684556	2.19058	0	7.22892	0	2.57393	0.0547645	1.47864	0	20.2629	4.98357	5.13417	8.92662	0	0	0.0547645	0	0	0	0	0	0	3.45016	0.0547645	0.438116	0	0.0547645	4.27163	1.91676	0.711939
339-U1387A	339-U1387A-22X-3, 1-3	U1387	A	22	X	3	1	3	191.53	208.74	213.29		821.65		0.661736	5.02141	0.0778513	0.62281	0	0	3.11405	0.116777	8.7972	0	1.28455	0.116777	2.21876	0	18.1004	4.59323	1.75165	16.232	0	0	0	0	0.0389257	0.0389257	0	0	0	6.03348	0	0	0	0.0778513	4.20397	0.233554	1.44025
339-U1387A	339-U1387A-22X-3, 27-29	U1387	A	22	X	3	27	29	191.79	210.99	213.55		822.561		0.123916	7.43494	0.0309789	0.495663	0.5886	0.0309789	1.98265	0	6.04089	0.495663	3.5316	0.0929368	0.619579	0	16.5118	4.80173	0.774473	9.4176	0	0	0	0.0309789	0	0	0	0	0.0309789	5.1425	0.0309789	0	0	0.0619579	4.77076	1.27014	1.05328
339-U1387A	339-U1387A-22X-3, 51-53	U1387	A	22	X	3	51	53	192.03	211.23	213.79		823.402		0.121568	9.72546	0.769932	0.709148	0	0.861108	0.648364	0.121568	5.18691	0	0.303921	0.486273	1.86405	0.486273	10.1509	2.87711	1.13464	6.48364	0.0607841	0	0	0	0	0	0	0	0	4.21437	1.35751	0	0.0607841	0.0607841	5.9771	1.43856	0.709148
339-U1387A	339-U1387A-22X-3, 77-79	U1387	A	22	X	3	77	79	192.29	211.49	214.05		824.313		0.0672043	13.3289	0.358423	0	0.0224014	0.851254	0.358423	0	3.31541	0.0224014	1.99373	0.739247	0.604839	0.268817	2.35215	3.069	0.896057	14.7849	0.0672043	0	0	0	0	0	0	0.0224014	0	3.1138	1.43369	0.0672043	0.0224014	0	4.56989	1.79211	1.14247
339-U1387A	339-U1387A-22X-3, 103-105	U1387	A	22	X	3	103	105	192.55	211.75	214.31		825.224		0.0357718	4.75765	0.286174	1.1447	0	0.160973	0	0.0357718	0.643892	0	0.894294	0.822751	0.679664	0.679664	0.679664	2.75443	1.21624	10.7315	0.178859	0	0.0357718	0.0357718	0.0715436	0.0357718	0	0	0	2.75443	2.93329	0	0.0715436	0.0357718	2.03899	0.429261	0.965838
339-U1387A	339-U1387A-22X-3, 117-119	U1387	A	22	X	3	117	119	192.69	211.89	214.45		825.715		0.265604	0.0664011	0.332005	0	0.132802	0.929615	0	0	2.05843	0	3.45286	1.06242	1.19522	0.59761	7.37052	3.71846	6.70651	18.6587	0.0664011	0	0.132802	0	0	0	0	0.0664011	0.0664011	1.39442	0.0664011	3.18725	0	0.199203	1.92563	0.265604	1.26162
339-U1387A	339-U1387A-22X-3, 128-130	U1387	A	22	X	3	128	130	192.8	212	214.56		826.1		0	15.0903	2.51177	0	0.0784929	0	1.25589	0	2.51177	0	1.27551	0.72606	0.647567	0.0784929	11.4011	7.20173	0.196232	15.8752	0	0	0	0	0.0392465	0	0	0	0	2.68838	0	0.627943	0.0392465	0	0.941915	0.0196232	2.51177
339-U1387A	339-U1387A-22X-4, 0-2	U1387	A	22	X	4	0	2	193.02	212.22	214.78		827.135		0.0468604	10.4967	1.17151	1.87441	0.796626	0	0.749766	0.492034	1.14808	0	0.117151	0.210872	0.187441	0.0234302	8.03655	3.79569	2.38988	22.7741	0	0	0	0.374883	0	0	0	0	0	2.2493	1.92127	0.374883	0	0.0234302	3.79569	0.374883	0.398313
339-U1387A	339-U1387A-22X-4, 26-28	U1387	A	22	X	4	26	28	193.28	212.48	215.04		828.358		0.123305	15.1254	1.39745	0.698726	0.0411015	0	2.6305	0	4.64447	0	0.205508	0.287711	0.082203	0.082203	6.00082	8.59022	1.19194	17.3448	0	0	0.0411015	0	0	0	0	0	0	4.39786	0.0411015	0.657624	0	0	3.24702	0.0411015	2.13728
339-U1387A	339-U1387A-22X-4, 49-51	U1387	A	22	X	4	49	51	193.51	212.71	215.27		829.439		0.102006	9.82659	0.0680041	0.442027	0.034002	0	2.85617	0.476029	3.70622	0	1.7001	0.0680041	1.32608	0	13.7368	8.2625	3.2982	18.8711	0	0	0	0	0	0	0	0	0	1.12207	0.034002	0	0	0.034002	3.09419	1.19007	1.87011
339-U1387A	339-U1387A-22X-4, 77-79	U1387	A	22	X	4	77	79	193.79	212.99	215.55		830.756		0.324525	7.41771	0.463607	0	0.0927214	0	2.5962	0	8.34492	0	0.741771	0	0	0	15.6699	3.01344	1.0663	16.5044	0	0	0	0	0	0	0	0	0	1.15902	0.370885	0.370885	0	0	2.22531	0.0927214	2.31803
339-U1387A	339-U1387A-22X-4, 101-103	U1387	A	22	X	4	101	103	194.03	213.23	215.79		831.885		0.0324097	4.6994	0.534759	0	0	0	1.55566	0.0324097	8.81543	0	0	0	0.518555	0	11.4568	8.34549	0.729217	17.2257	0	0	0	0	0	0	0	0	0.518555	2.13904	0.518555	3.11133	0	0	5.3638	0.0324097	1.08572
339-U1387A	339-U1387A-22X-4, 114,5-116,5	U1387	A	22	X	4	114.5	116.5	194.165	213.365	215.925		832.544		0.0320616	4.39243	0.288554	0	0	0	6.6688	0	9.04136	0	1.53895	0	0	0	10.2597	5.77108	1.41071	16.2552	0	0	0	0	0	0	0	0	0	1.53895	0.256492	1.28246	0	0	3.59089	0.673293	0.320616
339-U1387A	339-U1387A-22X-5, 2-4	U1387	A	22	X	5	2	4	194.54	213.74	216.3		834.284		0	4.02552	0.628987	0.575074	0.0179711	0.0179711	7.7635	0.413335	9.20119	0	0.664929	0.0539132	0.34145	0	11.3757	3.19885	0.889568	11.2319	0	0	0.0179711	0	0	0.0179711	0	0.0179711	0.0179711	0.646958	1.16812	1.45566	0	0	2.69566	0.485219	0.467248
339-U1387A	339-U1387A-22X-5, 27-29	U1387	A	22	X	5	27	29	194.79	213.99	216.55		835.46		0	1.14313	1.66706	0	0	0.0446535	1.53608	0	1.91712	0.381043	1.15504	0.154799	1.21457	0.214337	5.76328	1.58371	1.08657	13.396	0.428673	0.0119076	0.809717	0	0.0238152	0	0	0.0119076	0.0119076	4.02477	0.381043	0.0476304	0	0	2.72684	0.0357228	1.38128
339-U1387A	339-U1387A-22X-5, 50-52	U1387	A	22	X	5	50	52	195.02	214.22	216.78		836.679		0.277713	5.60056	1.20343	0.647998	0.138857	0.0462856	1.48114	0.0462856	7.45198	0	1.01828	0.647998	1.66628	0.185142	8.19255	4.67484	1.73571	14.4874	0	0	0	0	0	0	0	0.370285	0	3.70285	0	0	0	0.0925712	1.80514	1.34228	1.01828
339-U1387A	339-U1387A-22X-5, 75-77	U1387	A	22	X	5	75	77	195.27	214.47	217.03		838.121		0.252048	6.98533	0.900171	0.648123	0.0360068	0.0360068	0.576109	0	2.95256	0	0.828157	0.0720137	1.29625	0	13.9707	3.7087	1.30525	14.9788	0	0	0	0	0	0	0	0	1.76434	1.98038	2.30444	0.0360068	0	0.0360068	3.92475	3.7087	0.324062
339-U1387A	339-U1387A-22X-5, 100-102	U1387	A	22	X	5	100	102	195.52	214.72	217.28		839.562		0.159331	8.4047	0.0398327	1.47381	0	0	4.46126	0.0398327	4.5011	0	0.0796654	0.0398327	0.238996	0	8.32503	4.74009	2.25055	12.7465	0	0	0	0	0	0	0	0.637323	0	3.30611	0.716989	0.637323	0.637323	0.159331	3.62478	1.23481	0.159331
339-U1387A	339-U1387A-22X-5, 122-124	U1387	A	22	X	5	122	124	195.74	214.94	217.5		840.83		0.520033	6.05129	0.898239	0	0	0.756412	4.53847	0	4.58575	0	0.0472757	0.0945515	1.98558	0.0472757	5.38943	3.35658	3.27384	0	0	0	0.0945515	0	0.0472757	0	0	0.0945515	1.51282	1.93831	1.51282	0.756412	0.0472757	0.141827	3.92389	2.08013	0.99279
339-U1387A	339-U1387A-22X-6, 1-3	U1387	A	22	X	6	1	3	196.03	215.23	217.79		842.502		1.72414	9.25287	2.29885	3.62069	0.114943	0	1.37931	0.287356	3.73563	0	1.2069	0.172414	1.43678	0	7.87356	4.1954	2.35632	0	0.0574713	0	0	0	0	0	0	0	0	5.51724	0.91954	0.91954	0	0	7.58621	1.09195	1.14943
339-U1387A	339-U1387A-22X-6, 26-28	U1387	A	22	X	6	26	28	196.28	215.48	218.04		843.943		0.178982	18.0005	6.98031	0.102276	0.127845	0.0511378	0.409103	0	7.82409	0	0.869343	0.127845	0	0	9.94631	8.3866	1.17617	0	0	0	0	0	0	0.0255689	0	0	0	4.21887	0	1.63641	0	0	6.4945	0.0511378	0
339-U1387A	339-U1387A-22X-6, 52-54	U1387	A	22	X	6	52	54	196.54	215.74	218.3		845.442		0	28.7441	0.80591	2.82069	1.56705	0.0895456	0.0447728	0.223864	5.73092	0	0.716364	0.0447728	0.268637	0	11.5961	7.20842	1.49989	0	0	0	0	0	0	0	0	0	0	2.23864	0.716364	1.4775	0	0.0447728	3.17887	0.0447728	1.07455
339-U1387B	339-U1387B-22X-1, 125-127	U1387	B	22	X	1	125	127	196.15	214	218.42		846.134		0.272702	17.9984	0.109081	0.545405	0	0	4.96319	0	7.96291	0	1.79984	0.163621	1.69076	0.109081	11.399	3.16335	0.627216	0.436324	0	0	0	0	0	0	0.436324	0	0.0545405	2.61794	0	0.436324	0	0	6.21762	0.927188	0.981729
339-U1387A	339-U1387A-22X-6, 75-77	U1387	A	22	X	6	75	77	196.77	215.97	218.53		846.768		0.276543	17.8568	2.80494	0.158025	0.0790123	0.0691358	4.42469	0	6.43951	0	0	0	0	0	7.7037	8.53333	0.296296	0	0	0	0	0	0	0	0	0.632099	0	3.95062	0	2.5679	0	0.0395062	8.61235	0.118519	0.869136
339-U1387B	339-U1387B-22X-2, 2-4	U1387	B	22	X	2	2	4	196.42	215.62	218.69		847.691		0.515889	10.676	0.630531	1.46168	0.0429907	0	5.5458	0.501558	3.8405	0	1.34704	0.171963	1.26106	0.0429907	9.14269	5.78942	3.88708	0.917135	0.128972	0	0.0429907	0	0.0429907	0	0	0	0	2.30717	0.501558	0	0	0	3.71153	1.06044	1.21807
339-U1387A	339-U1387A-22X-6, 100-102	U1387	A	22	X	6	100	102	197.02	216.22	218.78		848.209		0.183676	16.3012	2.20411	0	0	0	2.20411	0	7.57663	0	0.137757	0.0918379	0.413271	0.413271	10.791	1.33165	1.04466	0	0	0	0	0	0	0	0	0	0	4.5919	0.367352	1.14797	0	0	7.9899	1.699	2.80106
339-U1387B	339-U1387B-22X-2, 27-29	U1387	B	22	X	2	27	29	196.67	214.52	218.94		849.132		0.363036	8.0198	1.61716	1.12211	0	0	3.16832	1.15512	6.36964	0	1.08911	0.0990099	1.32013	0.0660066	7.49175	5.08251	3.39934	0	0.0330033	0	0.0330033	0	0	0	0.528053	0	0	1.25413	1.58416	1.05611	0	0	3.86139	2.0462	0.726073
339-U1387A	339-U1387A-22X-6, 121-123	U1387	A	22	X	6	121	123	197.23	216.43	218.99		849.42		0.259249	7.60464	1.42587	0	0	0	4.83932	0	7.64785	0	4.27761	0.864164	2.37645	0.129625	0.432082	5.01215	3.25682	0	0.0432082	0	0.0864164	0	0	0	0	0.0864164	0	1.72833	0	0	0	0	7.60464	3.28382	1.5555
339-U1387A	339-U1387A-22X-6, 135-137	U1387	A	22	X	6	135	137	197.37	216.57	219.13		850.607		0.790722	4.6389	2.63574	0	0	0	3.79547	0	2.10859	0	1.4233	0.0527148	0.210859	0	16.7106	11.2283	3.05746	1.26516	0	0	0	0	0	0.0527148	0	0.896152	0.843437	9.64681	0.421719	2.58303	0	0.0527148	4.32261	1.00158	0.474433
339-U1387B	339-U1387B-22X-2, 51,5-53,5	U1387	B	22	X	2	51.5	53.5	196.915	214.765	219.185		851.116		0.652377	3.40168	0.885368	3.44828	0.0465983	0.0465983	5.96459	0	4.19385	0	2.09692	0	0.0465983	0.0931966	13.4669	10.5312	2.28332	1.11836	0	0	0	0	0	0	0	0.0465983	0.0465983	5.31221	0.372787	3.02889	0	0.0465983	7.40913	1.39795	0.465983
339-U1387B	339-U1387B-22X-2, 77-79	U1387	B	22	X	2	77	79	197.17	215.02	219.44		853.237		1.51351	2.27027	1.72973	0	0.108108	0	4.75676	0	1.94595	0	0.540541	0	0.972973	0	15.1351	19.5676	1.2973	3.45946	0.108108	0	0	0.108108	0.864865	0	0	0.432432	0	9.94595	0	1.94595	0	0.216216	6.7027	0.756757	0.108108
339-U1387B	339-U1387B-22X-2, 103-105	U1387	B	22	X	2	103	105	197.43	215.28	219.7		855.442		0.96463	2.59708	2.84442	4.15533	0.0742023	0.395746	0.395746	4.50161	0	0	1.63245	0	0.445214	0	5.61464	15.8051	3.2649	15.5083	0	0	0	0	0	0	0	0	0	9.96785	0	0.469948	0	0.148405	7.37076	2.89389	0.618353
339-U1387B	339-U1387B-22X-2, 114-116	U1387	B	22	X	2	114	116	197.54	215.39	219.81		856.375		0	2.84746	7.18644	0	0.0677966	0	1.08475	0.542373	0.610169	0	0.20339	0	0	0	7.72881	16.4068	3.11864	18.5085	0	0	0	0.0677966	0	0	0	0	0	8.0678	0	3.9322	0	0.0677966	5.28814	2.50847	0.745763
339-U1387B	339-U1387B-22X-2, 141-143	U1387	B	22	X	2	141	143	197.81	215.66	220.08		858.665		0	5.00472	8.8763	0.141643	0.0944287	0	0.0944287	0	3.02172	0	1.18036	0	0	0	4.20208	10.3872	1.74693	0.424929	0	0	0	0	0	0	0	0	0	6.42115	0.802644	2.69122	0	0	5.00472	0.75543	0.849858
339-U1387B	339-U1387B-22X-3, 2-4	U1387	B	22	X	3	2	4	197.92	215.77	220.19		859.598		0.145525	12.2241	2.57094	7.66432	0	0	1.45525	0.0970167	5.14189	0	0.388067	0	0	0	2.47393	7.47029	0.897405	0	0	0	0	0.776134	0	0	0	1.1642	0.0485084	5.2389	0.145525	4.02619	0	0	4.85084	3.68664	0.436575
339-U1387B	339-U1387B-22X-3, 14-16	U1387	B	22	X	3	14	16	198.04	215.89	220.31		860.616		0	8.2574	10.0797	5.63781	0	0	1.48064	0	10.5353	0	0.569476	0	0	0	3.70159	7.85877	0.968109	0	0	0	0	0	0	0	0	0	0.455581	3.41686	0	3.64465	0	0	9.51025	5.06834	0.626424
339-U1387B	339-U1387B-22X-3, 27-29	U1387	B	22	X	3	27	29	198.17	216.02	220.44		861.718		0.741084	3.47383	0.741084	17.1376	0	0	0.741084	0	6.06762	1.48217	0.787402	0	0.0463177	0	4.21491	5.7434	0.555813	0	0	0	0	0	0	0	0	0.741084	0.741084	3.33488	4.4465	0	0	0.0463177	3.75174	5.2339	0.787402
339-U1387B	339-U1387B-22X-3, 39-41	U1387	B	22	X	3	39	41	198.29	216.14	220.56		862.736		0	2.20764	2.86396	18.2578	0	0	2.86396	0.178998	9.06921	0.596659	0.119332	0	0.119332	0	7.21957	3.69928	1.31265	0	0	0	0	0	0	0	0	0.0596659	0.477327	2.4463	1.90931	0	0	0	3.75895	0.835322	0.536993
339-U1387B	339-U1387B-22X-3, 46-48	U1387	B	22	X	3	46	48	198.36	216.21	220.63		863.33		0.107857	8.58545	5.39287	0.388287	0.00539287	0.0107857	0.345144	0.0215715	20.5361	0	0.73343	0	0	0	5.69487	1.61786	0.690287	0.690287	0	0	0	0	0	0	0	0	0	1.31586	0.366715	1.40215	0	0.0215715	0.172572	0.258858	2.15715
339-U1387B	339-U1387B-22X-3, 63-65	U1387	B	22	X	3	63	65	198.53	216.38	220.8		864.771		0	2.00382	0.540712	3.18066	0.159033	0	1.01781	0.318066	13.9313	0.0318066	0.0318066	0	0.572519	0	8.71501	1.9402	2.06743	0	0	0	0	0	0	0	0	0	0	1.9084	0.508906	0	0	0.0318066	0.0954198	0.0954198	1.17684
339-U1387B	339-U1387B-22X-3, 78-80	U1387	B	22	X	3	78	80	198.68	216.53	220.95		866.008		0	2.26054	0	0.0990017	1.27877	0.0742513	0.528009	0.519759	26.7222	0	0.0495009	0	0.0247504	0.0247504	16.7973	1.32002	1.09727	0	0	0	0	0	0	0	0	0	0	1.57578	0.57751	0.57751	0	0.0247504	0	1.22927	0.123752
339-U1387B	339-U1387B-22X-3, 89,5-91,5	U1387	B	22	X	3	89.5	91.5	198.795	216.645	221.065		866.965		0	5.166	0	0.801374	0.715512	0.0858615	0	2.18947	19.8197	0	0.171723	0.0429307	0.0858615	0	10.0887	1.98912	2.28964	0	0	0	0	0	0	0	0	0	0.0429307	0.930166	0.500859	0.543789	0	0	0	0.257584	3.29136
339-U1387B	339-U1387B-22X-3, 96-98	U1387	B	22	X	3	96	98	198.86	216.71	221.13		867.444		0	0.760682	4.46901	0.0475426	0.879539	0.0653711	0.0237713	0.0950853	22.6065	0.380341	0	0.118857	0.0950853	0	9.77001	1.28365	0.404112	0	0	0	0	0	0	0	0	0	0	1.42628	0.831996	0	0	0.0475426	0.071314	2.80502	0.808225
339-U1387B	339-U1387B-22X-3, 114-116	U1387	B	22	X	3	114	116	199.04	216.89	221.31		868.879		0	1.27652	7.43383	0	0.0375446	0.300357	0.150178	0.0750892	21.3629	0	0.638258	0	0.0375446	1.31406	7.47137	3.86709	1.33283	0	0	0	0	0	0	0	0	0	0	2.92848	0.638258	0.675803	0	0	0.0375446	0.825981	1.50178
339-U1387B	339-U1387B-22X-3, 127,5-129,5	U1387	B	22	X	3	127.5	129.5	199.175	217.025	221.445		870		0	2.62117	2.25963	0	0.225963	0.395436	0.0451926	0.180771	20.2463	0	0.768275	0.0451926	0.0451926	0.0903853	7.54717	3.79618	0.361541	0	0	0	0	0	0.0451926	0	0	0	0	0.813467	0	0	0	0	0	0.271156	0.903853
339-U1387B	339-U1387B-22X-3, 141-143	U1387	B	22	X	3	141	143	199.31	217.16	221.58		871.03		0	0.752142	3.25928	0.0417856	0.0905356	0.710356	0.612856	0.0835713	7.29856	0	0.139285	0.0139285	0.0417856	0.0557142	2.79964	2.11714	1.42071	0	0	0.0417856	0.0139285	0	0.0278571	0	0	0.445713	0	1.01678	0.445713	0.459642	0	0	1.12821	0.529285	0.529285
339-U1387B	339-U1387B-22X-4, 2-4	U1387	B	22	X	4	2	4	199.42	217.27	221.69		871.91		0	2.46967	0.128852	0	0	0.483196	0.171803	0.107377	7.04392	0.0214754	0.128852	0.0429507	0.0859014	0.0859014	7.88146	1.76098	0.450982	0	0.0859014	0.0859014	0.730162	0	0.0429507	0.128852	0	0	0.0214754	0.987866	0.751637	0.730162	0.0214754	0	2.31934	0.193278	3.0495
339-U1387B	339-U1387B-22X-4, 27-29	U1387	B	22	X	4	27	29	199.67	217.52	221.94		873.33		0	0.677757	1.57116	0.585336	0.0308071	0.616143	0.0308071	0.21565	16.6359	0	0.585336	0	0.616143	0.184843	3.17314	2.03327	0.338879	0	0.0924214	0.0616143	0.523722	0	0	0.0924214	0.492914	0	0	2.27973	0	0.523722	0.0308071	1.01664	0.985829	0.0924214	2.03327
339-U1387B	339-U1387B-22X-4, 42-44	U1387	B	22	X	4	42	44	199.82	217.67	222.09		874.17		0	9.26735	1.17153	0.297255	0.472111	0.577024	0	0.59451	14.9851	0	0.559538	0.0349711	0.384683	0	5.7003	1.46879	0.716909	0	0.0349711	0	0	0	0	0.297255	0	0	0	2.58787	0.59451	0.559538	0	0	1.73107	0.332226	1.13656
339-U1387B	339-U1387B-22X-4, 52-54	U1387	B	22	X	4	52	54	199.92	217.77	222.19		874.74		0	7.01071	3.81694	1.94742	0.83739	0.662123	0	0.97371	16.9036	0.0389484	1.36319	0.0778968	2.06426	0.0389484	8.10127	1.86952	0.97371	0	0.0778968	0.0778968	0	0	0.0389484	0.0389484	0	0	0	2.53165	0.662123	0.662123	0	0	0.350536	3.46641	0
339-U1387B	339-U1387B-22X-4, 70-72	U1387	B	22	X	4	70	72	200.1	217.95	222.37		875.76		0	7.698	0.111029	0.0370096	0.129534	1.18431	0.111029	0.111029	8.03109	0.592154	0.148038	0.222058	0.370096	0.370096	2.33161	1.9245	0.388601	0	0.0740192	0.148038	0	0	0	0.0370096	0	0	0	0.407106	1.22132	0.0370096	0.0370096	0	0.370096	0.99926	0.481125
339-U1387B	339-U1387B-22X-4, 101-103	U1387	B	22	X	4	101	103	200.41	218.26	222.68		877.52		0	2.58732	0.87969	6.88228	0.206986	4.7348	0	0.103493	9.93532	0	0.72445	0.103493	2.06986	0	6.5718	2.48383	0.931436	0	0.0517464	0.0517464	0.0517464	0	0	0	0	0	0.413972	2.79431	0.413972	0	0	0	2.38034	0.776197	2.06986
339-U1387B	339-U1387B-22X-4, 127-129	U1387	B	22	X	4	127	129	200.67	218.52	222.94		878.99		0.0463499	8.94554	0.13905	0.417149	0	1.69177	0	0.1854	9.73349	0	2.64195	0.1854	1.15875	0.1854	4.40324	1.2978	0.695249	0	0.23175	0.0926999	0	0	0.3708	0	0	0	0	4.95944	1.4832	0	0.3708	0.0926999	0.741599	1.71495	0.0926999
339-U1387B	339-U1387B-22X-5, 2-4	U1387	B	22	X	5	2	4	200.92	218.77	223.19		880.4		0	9.7844	0.632089	0	0	3.71461	0	0.155858	11.8971	0	1.18625	0.103905	1.26418	0	3.74058	0.917828	2.02615	0.554161	0.103905	0	0	0.580137	0.0519526	0.0519526	0	0	0	1.49797	0.554161	0.554161	0.0779288	0	1.25552	0.0779288	1.9742
339-U1387B	339-U1387B-22X-5, 27-29	U1387	B	22	X	5	27	29	201.17	219.02	223.44		881.82		0	16.1616	0.118835	0.784314	0.40404	4.26619	0	0.0713012	10.1723	0	0.475342	0.142602	0.118835	0	4.99109	2.11527	0.617944	0	0.0237671	0.0475342	0	0	0.760547	0.0475342	0	0	0	2.99465	0.0475342	0.0475342	0.0237671	0	2.0915	0.499109	1.63993
339-U1387B	339-U1387B-22X-5, 52,5-54,5	U1387	B	22	X	5	52.5	54.5	201.425	219.275	223.695		883.29		0	8.61481	2.26216	0.185931	0	5.25256	0	0.139448	10.6446	0	0.635265	0.0464828	0.0464828	0	10.7065	3.95104	0.418345	0	0.139448	0	0	0	0	0.635265	0	0	0.991633	3.36226	0	0	0.139448	0.0464828	3.00589	0.0464828	1.98327
339-U1387B	339-U1387B-22X-5, 77-79	U1387	B	22	X	5	77	79	201.67	219.52	223.94		884.65		0	8.46577	0.275061	0.51956	0	2.5978	0.51956	0.0611247	8.92421	0.0305623	6.02078	0.152812	0.091687	0.0305623	3.78973	1.89487	0.213936	0	0.51956	0.091687	0.488998	0.0305623	0.0305623	0.0305623	0	0	0	0.91687	0.550122	0	0.091687	0.0305623	2.62836	0	0.0611247
339-U1387B	339-U1387B-22X-5, 101-103	U1387	B	22	X	5	101	103	201.91	219.76	224.18		885.12		0	5.85084	5.274	0.824063	0	3.87309	0	0.741656	8.15822	0	0.247219	0.741656	1.23609	0	1.81294	1.64813	0.947672	0	0.0824063	0.0824063	0	0	0	0.164813	0.0824063	0.0824063	0	5.43881	0.0824063	0	1.48331	0	5.35641	0.0824063	0.741656
339-U1387B	339-U1387B-22X-5, 127-129	U1387	B	22	X	5	127	129	202.17	220.02	224.44		885.63		0.0532765	15.1838	2.07778	0	0.0532765	14.3314	0	0.0532765	13.9052	0	0.586042	0.532765	0	0	1.5983	2.13106	0.532765	0	0	0	0	0	0	0	0.426212	0	0	5.48748	0.426212	0	0.426212	0.0532765	4.3154	1.38519	1.43847
339-U1387B	339-U1387B-22X-6, 2-4	U1387	B	22	X	6	2	4	202.42	220.27	224.69		886.12		0	10.4145	0.673043	1.31066	0.31881	9.49345	0	0.0708466	15.6217	0	0.10627	0.10627	0.63762	0	6.12823	2.05455	0.779313	0	0.0708466	0	0	0.0354233	0	0.21254	0.566773	0	0.566773	1.87744	0.566773	0.0354233	0.10627	0.0354233	2.5859	0.141693	0.0354233
339-U1387B	339-U1387B-22X-6, 50-52	U1387	B	22	X	6	50	52	202.9	220.75	225.17		887.06		0	17.2599	3.75048	4.93685	0.191351	0.459242	0	0.153081	13.0119	0	0.688863	0.0765404	0.153081	0.0382702	6.65901	0.956755	0.191351	0	0	0	0	0	0	0	0	0	0	2.9468	0	0.612323	0	0	5.54918	0	0.0382702
339-U1387B	339-U1387B-22X-6, 74-76	U1387	B	22	X	6	74	76	203.14	220.99	225.41		887.53		0	8.01955	0.0287439	0.459902	0.258695	0.804829	0	0.0574878	7.01351	0	1.52343	0.258695	0.919805	0.0862317	1.49468	3.2768	1.58091	0	0.0287439	0	0	0	0.0287439	0.0574878	0	0	0	2.70193	0.948548	0	0	0.0287439	1.23599	0.51739	1.95458
339-U1387B	339-U1387B-22X-6, 98-100	U1387	B	22	X	6	98	100	203.38	221.23	225.65		888.07		0	2.85887	2.61727	0.684518	0.795249	1.48983	0	0.0201329	9.34165	0.644252	0.0201329	0	0.100664	0.0201329	7.36863	0.664385	0.916046	0	0	0	0	0.0603986	0	0.0201329	0	0	0.0402658	1.85222	1.99315	0.0603986	0.0201329	0	0.744916	0.845581	0.765049
339-U1387A	339-U1387A-23X-2, 15-17	U1387	A	23	X	2	15	17	200.85	219.61	225.97		888.9		0	4.11523	0.0222445	0.711823	0.467134	0.0611723	0	0.0444889	9.80981	0	0.778556	0	0.0667334	0.0444889	4.5045	2.02425	0.917584	0	0	0	0	0.0111222	0.0333667	0.0111222	0	0	0.0111222	2.19108	0.411523	0.389278	0.0111222	0	1.2012	0.789679	0.0778556
339-U1387A	339-U1387A-23X-2, 52-54	U1387	A	23	X	2	52	54	201.22	219.98	226.34		889.87		0	2.8303	3.64542	0.362278	0.928337	0.362278	0	0.181139	7.29084	0.0452847	0.38492	0	0.0452847	0	8.80788	2.10574	0.215102	0	0	0.0226424	0	0	0	0	0	0	0	2.28688	1.83403	0.792483	0	0	1.26797	1.26797	0.430205
339-U1387A	339-U1387A-23X-2, 76-78	U1387	A	23	X	2	76	78	201.46	220.22	226.58		890.49		0	3.14743	0.0503588	0	0.188846	0.40287	0	0.125897	10.9782	0	0.100718	0	0.0251794	0.0251794	5.43875	1.03236	1.46041	0	0	0	0	0	0	0	0	0	0.0503588	0.931638	0	0.125897	0	0	0.0503588	0.0503588	0.125897
339-U1387A	339-U1387A-23X-2, 99-101	U1387	A	23	X	2	99	101	201.69	220.45	226.81		891.09		0	2.91563	1.98511	0.0206782	0.889165	0.0413565	0.0206782	0.124069	12.6551	0.0206782	0.765095	0.0206782	0	0	5.76923	1.38544	0.268817	1.98511	0	0	0	0	0.0206782	0.0620347	0	0	0.0413565	1.6129	0.723739	0.868486	0.0620347	0	1.53019	0.165426	0.310174
339-U1387A	339-U1387A-23X-2, 123-125	U1387	A	23	X	2	123	125	201.93	220.69	227.05		891.71		0	6.40988	0	0	0.793884	0.588062	0	0.0588062	6.70391	0	0.764481	0.0588062	0	0.588062	4.11644	3.41076	1.58777	0	0	0	0	0	0	0.0588062	0	0	0	2.99912	0.588062	0.823287	0.117612	0	1.58777	0.705675	0.235225
339-U1387A	339-U1387A-23X-3, 2,5-4,5	U1387	A	23	X	3	2.5	4.5	202.225	220.985	227.345		892.49		0	3.55966	0.0263678	0.870138	0.197759	0.224127	0.0791035	0.0527357	7.77851	0	0.922874	0	1.84575	0	5.9855	2.20171	0.290046	0.0527357	0	0	0	0.0263678	0.0263678	0	0	0	0	1.97759	0.870138	0.0527357	0.0263678	0.131839	0.0791035	0.395517	1.08108
339-U1387A	339-U1387A-23X-3, 15-17	U1387	A	23	X	3	15	17	202.35	221.11	227.47		892.81		0	4.81699	0	0	0.507051	0.760577	0	0	2.09159	0	0.760577	0	0	0	2.47187	2.58279	1.26763	0	0	0	0	0	0	0	0	0	0	1.20425	1.52115	0.0633814	0.0633814	0	0.760577	1.45777	0.253526
339-U1387A	339-U1387A-23X-3, 27-29	U1387	A	23	X	3	27	29	202.47	221.23	227.59		893.12		0	2.91262	0.485437	2.04394	0	2.45273	0.0510986	0	0.434338	0	1.40521	0	1.35411	0.153296	6.36178	2.40164	1.43076	0.408789	0.0255493	0.127747	0.0510986	0	0.0766479	0	0	0	0.0255493	0	2.88707	1.37966	0.0510986	0	2.06949	0.127747	1.45631
339-U1387A	339-U1387A-23X-3, 49,5-51,5	U1387	A	23	X	3	49.5	51.5	202.695	221.455	227.815		893.72		0	4.74489	0.714592	0	0	0.485923	0.943261	0.457339	0.943261	0	0.228669	0.114335	1.25768	0.085751	3.40146	1.84365	1.17193	0	0.0571674	0.085751	0	0	0.0285837	0.485923	0.0285837	1.82936	0.0285837	2.28669	0.457339	0.600257	1.54352	0	2.08661	0.085751	0.714592
339-U1387A	339-U1387A-23X-3, 76,5-78,5	U1387	A	23	X	3	76.5	78.5	202.965	221.725	228.085		894.81		0.0299222	9.51526	0.628366	0.598444	0	1.70557	0.95751	0	8.85697	0	3.35129	0.2693	0.628366	0.0299222	7.18133	0.807899	2.00479	0	0.0897666	0	0.0299222	0.0299222	0	0.508677	0	0	0	1.91502	0.95751	0.987433	0.0598444	0.0299222	2.1544	2.66308	0.119689
339-U1387A	339-U1387A-23X-3, 101,5-103,5	U1387	A	23	X	3	101.5	103.5	203.215	221.975	228.335		896.2		0.124481	8.6722	0.0829876	1.3278	0.0829876	1.3278	0	0.124481	4.93776	0	0.788382	0.165975	1.28631	0.165975	6.0166	4.6473	1.49378	0.0414938	0.248963	0.0414938	0.6639	0.0414938	0.124481	0.0414938	0	0.0414938	0	1.45228	0.0829876	0.788382	0.0414938	0.0414938	1.45228	1.03734	0.0829876
339-U1387A	339-U1387A-23X-3, 127-129	U1387	A	23	X	3	127	129	203.47	222.23	228.59		897.59		0.174121	8.05311	1.26238	0.478833	0	2.99271	0.348242	0.0870606	5.61541	0	0.696485	0.478833	0.914136	0.174121	4.7448	2.04592	1.19708	0	0.130591	0	0	0.0435303	0.0435303	0.391773	0	0	0.348242	5.09305	0.348242	0.478833	0.0870606	0	3.8742	1.91533	1.21885
339-U1387A	339-U1387A-23X-4, 2-4	U1387	A	23	X	4	2	4	203.72	222.48	228.84		898.84		0.0411438	8.80477	0.205719	0.0411438	0.0411438	0.185147	0	0	7.44703	0	0.0411438	0.246863	3.0035	0	6.87101	1.93376	2.30405	0	0.246863	0	0	0.0411438	0.0411438	0.0411438	0	0	0.0411438	5.14297	0.740588	0.699445	0.699445	0.0822876	3.6618	2.26291	2.88007
339-U1387A	339-U1387A-23X-4, 27-29	U1387	A	23	X	4	27	29	203.97	222.73	229.09		899.93		0.0893655	8.37057	0.953232	1.01281	0.059577	1.19154	0	0.0297885	8.63867	0	0.476616	0.297885	0.476616	0.0893655	5.9577	2.8597	1.42985	0	0.178731	0	0	0	0	0.0297885	0	0	0	6.64284	0	3.51504	0	0	2.82991	1.78731	0.20852
339-U1387A	339-U1387A-23X-4, 51-53	U1387	A	23	X	4	51	53	204.21	222.97	229.33		900.98		0.0620444	5.24275	4.12595	1.52009	0	1.69071	0	0.558399	6.63875	0.0310222	1.58213	0.0620444	0.837599	0	14.8906	7.9727	1.42702	0	0	0.0930665	0	0.496355	0	0	0	0	0	2.72995	0.496355	0.71351	0.527377	0	0.837599	0.217155	1.45804
339-U1387A	339-U1387A-23X-4, 77-79	U1387	A	23	X	4	77	79	204.47	223.23	229.59		902.12		0.12751	6.94931	0.255021	1.05196	0	2.4227	1.05196	0.0318776	10.9659	0	0.573797	0.478164	0.79694	0	8.47944	4.59037	0.701307	0	0.0318776	0	0	0	0	0	0	0	0	3.76156	1.02008	3.31527	0	0	6.1205	1.46637	0.0637552
339-U1387A	339-U1387A-23X-4, 102-104	U1387	A	23	X	4	102	104	204.72	223.48	229.84		903.21		0.0617284	8.95062	5.4321	0.123457	0.555556	1.2963	0.493827	0	5.4321	0	1.54321	0.185185	0.802469	0	10.4321	4.25926	1.85185	0	0	0	0	0.493827	0	0	0	0	0.617284	5.4321	0	1.91358	0.493827	0	2.34568	4.25926	0.987654
339-U1387B	339-U1387B-23X-1, 38,5-40,5	U1387	B	23	X	1	38.5	40.5	204.785	223.735	230.095		904.34		0.280767	3.55639	3.4628	0.280767	0	1.7314	0	0	3.74357	0	5.56855	0.233973	0.795508	0	11.9794	6.08329	2.52691	0	0	0	0	0	0	0	0	0.0467946	0	4.49228	0.748713	2.48011	0	0.0467946	2.80767	0.842302	0.795508
339-U1387B	339-U1387B-23X-1, 52-54	U1387	B	23	X	1	52	54	204.92	223.87	230.23		904.91		0.149963	9.74756	0.983088	1.94951	1.0664	1.29134	0	8.5312	0.0499875	2.1328	0.449888	0.249938	0.549863	0	11.7971	5.58194	1.81621	0	0	0	0	0	0	0	0	0	0.5332	4.96543	0	1.89953	0	0	1.333	0.683163	0.633175
339-U1387B	339-U1387B-23X-1, 77-79	U1387	B	23	X	1	77	79	205.17	224.12	230.48		906		0.324675	7.37477	3.15399	0.0463822	0.0463822	3.3859	0.958565	0.0463822	4.45269	0	2.00989	0.0927644	0.664811	0	17.5788	5.73593	1.36054	0	0.0927644	0	0	0	0	0	0	0	0.479283	2.65925	1.43785	3.29314	0	0	2.99938	1.09771	1.57699
339-U1387B	339-U1387B-23X-1, 102-104	U1387	B	23	X	1	102	104	205.42	224.37	230.73		907.09		6.62406	3.71877	1.9756	0.116212	1.45264	1.45264	0	10.6915	0.0581058	1.39454	0.174317	0.40674	0.40674	0	12.2603	5.11331	1.0459	0	0	0	0	0.929692	0	0	0	0	0	4.59035	0	1.85938	0	0	3.13771	0	1.10401
339-U1387B	339-U1387B-23X-1, 126-128	U1387	B	23	X	1	126	128	205.66	224.61	230.97		908.13		0.0550055	5.94059	1.78768	1.32013	0.110011	1.97332	0.990099	0	9.0209	0	1.78768	0.0825083	0.247525	0	13.0088	4.07041	1.10699	0	0	0	0	0	0	0	0	0	0	2.9703	0	1.9802	0	0	2.9703	0	0.990099
339-U1387B	339-U1387B-23X-2, 2-4	U1387	B	23	X	2	2	4	205.92	224.87	231.23		909.27		0.30303	5.75758	2.95455	1.43939	0	6.21212	0.681818	0.0757576	9.31818	0	3.71212	0	0.0757576	0	4.84848	4.69697	0.909091	0	0.151515	0	0	0.30303	0.0757576	0	0	0	0	3.40909	0	1.13636	0.30303	0	2.34848	1.9697	0.227273
339-U1387B	339-U1387B-23X-2, 27-29	U1387	B	23	X	2	27	29	206.17	225.12	231.48		910.36		0.16835	2.06229	0.505051	1.0101	0	0.715488	0.673401	0.0841751	7.82828	0	2.6936	0.378788	1.17845	0.0420875	3.07239	2.27273	1.85185	0.3367	1.09428	0.0420875	0	0	0	0	0	0	0	6.06061	0.673401	1.09428	0	0	1.80976	0.210438	1.38889
339-U1387B	339-U1387B-23X-2, 77-79	U1387	B	23	X	2	77	79	206.67	225.62	231.98		911.91		0.30521	8.9383	0.828428	0.348812	0.392413	2.41988	0.348812	0.0436015	10.944	0	1.83126	0.436015	0.654022	0.0436015	7.93547	3.88053	2.35448	0	0.174406	0.0436015	0	0	0.0436015	0	0	0	0	4.44735	0.348812	1.39525	0	0.0436015	4.09854	0.523218	1.22084
339-U1387B	339-U1387B-23X-2, 100-102	U1387	B	23	X	2	100	102	206.9	225.85	232.21		912.32		0.149477	5.97907	2.01794	2.01794	0	2.31689	0	0	7.99701	0	2.76532	0.597907	1.42003	0.0747384	7.99701	5.08221	1.79372	0	0.44843	0	0	0	0	0.0747384	0	0	0	4.26009	0.672646	1.27055	0	0	1.19581	0.224215	0
339-U1387B	339-U1387B-23X-3, 2-4	U1387	B	23	X	3	2	4	207.42	226.37	232.73		913.27		0.209561	3.87688	0.91683	2.51473	0.104781	3.7852	0	0.0261952	7.72757	0	2.27898	0.0523903	1.65029	0.0261952	6.20825	1.93844	2.04322	0	0.0261952	0	0	0	0	0.0261952	0	0	0.0785855	8.0943	1.67649	2.20039	0	0.0785855	1.49312	3.66732	0.943026
339-U1387B	339-U1387B-23X-3, 52-54	U1387	B	23	X	3	52	54	207.92	226.87	233.23		914.18		0.441718	10.454	0.539877	0.539877	0	4.04908	0	0	7.55828	0	1.61963	0.0981595	0.588957	0	8.93252	3.97546	1.71779	0	0	0	0	0.0490798	0	0.490798	0	0	0	5.10429	0.0490798	3.33742	0	0.0490798	2.89571	0.539877	1.37423
339-U1387B	339-U1387B-23X-3, 77-79	U1387	B	23	X	3	77	79	208.17	227.12	233.48		914.64		0.237624	14.8119	0.871287	0.633663	0.0990099	2.59406	0.316832	0.316832	6.93069	0	1.38614	0.039604	0.910891	0	10.297	6.13861	1.50495	0	0.039604	0	0	0.0792079	0	0.118812	0.316832	0	0	5.94059	0.356436	0.871287	0	0	3.24752	0.712871	2.25743
339-U1387B	339-U1387B-23X-3, 101-103	U1387	B	23	X	3	101	103	208.41	227.36	233.72		915.08		0.425532	18.7234	2.06687	2.00608	0.0607903	1.70213	0.547112	0	3.46505	0	1.03343	0.243161	1.21581	0	4.31611	3.03951	0.790274	0	0	0	0	0.0607903	0	0.486322	0.486322	0	0	9.30091	0.486322	0.668693	0	0	2.4924	0.121581	2.12766
339-U1387B	339-U1387B-23X-4, 2-4	U1387	B	23	X	4	2	4	208.92	227.87	234.23		916		0.213523	2.98932	2.63345	0	0.0711744	4.69751	0	0	5.12456	0	1.77936	0.0711744	0.0711744	0	6.47687	6.90391	0.782918	0	0	0	0	0	0	0	0	0	0	8.11388	0.569395	2.4911	0	0.142349	2.7758	0.854093	1.28114
339-U1387B	339-U1387B-23X-4, 51-53	U1387	B	23	X	4	51	53	209.41	228.36	234.72		916.9		0	12.536	1.99336	3.89812	0	3.34441	0	0	2.17054	0	1.55039	0.0442968	0.0442968	0	3.45515	10.8084	3.18937	0	0	0	0.354374	0.0442968	0	0	0	0	0	13.8649	0.398671	0.797342	0	0.0442968	3.27796	0.620155	0.442968
339-U1387B	339-U1387B-23X-4, 101-103	U1387	B	23	X	4	101	103	209.91	228.86	235.22		917.81		0	13.3416	0.994406	0.994406	1.77129	0.497203	0	0	3.43899	0	0.0414336	0	0	0	2.23741	12.3058	1.02548	0	0	0	0	0	0	0	0	0	0	7.16801	0.372902	0	0	0	0	0.248602	0
339-U1387B	339-U1387B-23X-4, 126-128	U1387	B	23	X	4	126	128	210.16	229.11	235.47		918.26		0	13.8608	1.04977	3.61586	0.913686	0.0972006	0	0	2.87714	0	0.369362	0.174961	0	0	2.13841	12.1112	1.10809	0	0	0	0	0	0	0	0	0	0.0194401	7.21229	0.311042	0.0194401	0	0	0.0777605	0.155521	0.0194401
339-U1387B	339-U1387B-23X-5, 2-4	U1387	B	23	X	5	2	4	210.42	229.37	235.73		918.74		0	8.38348	2.65615	1.45258	1.43183	0.498029	0	0	2.82216	0	0	0.0415024	0	0	0.788545	23.1998	1.57709	0	0	0	0	0	0	0	0	0	0	7.63644	0	0	0	0	0	0.124507	0.705541
339-U1387B	339-U1387B-23X-5, 27-29	U1387	B	23	X	5	27	29	210.67	229.62	235.98		919.19		0	9.66254	1.35955	0.436999	0.75261	1.69944	0	0.0485555	0.922554	0	0	0.0485555	0	0	0.679777	16.5574	2.81622	0	0	0	0	0	0	0	0	0	0	5.82666	0	0.388444	0.388444	0	1.21389	0.194222	0.242777
339-U1387B	339-U1387B-23X-5, 53-55	U1387	B	23	X	5	53	55	210.93	229.88	236.24		919.67		0	10.9208	7.05219	3.06266	0.120895	2.39774	0	0	6.40741	0	0.68507	0.0402982	0	0	3.14326	13.0566	0.68507	0	0	0	0	0	0	0.0402982	0	0	0	6.12533	0	1.93431	0	0.161193	3.66714	0.0402982	0.402982
339-U1387B	339-U1387B-23X-5, 77-79	U1387	B	23	X	5	77	79	211.17	230.12	236.48		920.1		0	20.2016	3.25708	2.32648	0	3.41218	0	0.0387747	2.94688	0	0.465297	0.116324	0.0387747	0.0387747	0.775494	14.7344	1.55099	0	0	0	0	0	0	0.0387747	0	0	0	6.55293	0.930593	0.930593	0.620396	0.116324	1.35712	0	0.310198
339-U1387B	339-U1387B-23X-5, 101-103	U1387	B	23	X	5	101	103	211.41	230.36	236.72		920.54		0.0292045	18.5741	3.15409	3.12489	0.0584091	3.36217	0	0	15.9165	0	1.10977	0.0584091	0.350454	0	0.905341	8.44011	0.467273	0	0	0	0.350454	0	0	0	0	0	0.0292045	2.5992	0	0.350454	0	0.0292045	0.204432	0	0
339-U1387B	339-U1387B-23X-5, 127-129	U1387	B	23	X	5	127	129	211.67	230.62	236.98		921.01		0	10.8046	1.09037	1.61903	0	14.2244	0.0330415	0	13.9765	0	1.15645	0	0.0660829	0	4.62581	6.74046	0.132166	0	0	0	0	0	0	0	0	0.0330415	0	3.17198	0	2.64332	0	0.594746	1.78424	0.0330415	1.71816
339-U1387B	339-U1387B-23X-6, 0-2	U1387	B	23	X	6	0	2	211.93	230.88	237.24		921.49		0.0266099	20.3034	0.0532198	0.0798297	0.0266099	4.843	0	0	10.9367	0	0.133049	0.0532198	0.0532198	0.0798297	5.21554	4.52368	0.771687	0	0	0	0	0	0	0	0	0.0266099	0.425758	2.34167	0.0532198	2.1554	0	0.0266099	1.30389	0	0.931346
339-U1387B	339-U1387B-23X-6, 25-27	U1387	B	23	X	6	25	27	212.18	231.13	237.49		921.94		0	12.8271	0.0445385	0	0	0.768289	0.0890769	0.0890769	7.66062	0	2.76139	0.534462	1.38069	0.400846	7.97239	2.85046	0.400846	0	0.222692	0.0445385	0	0	0	0	0	0	0	2.18239	0.0445385	0.133615	0	0	1.02438	0.178154	1.24708
339-U1387B	339-U1387B-23X-6, 50-52	U1387	B	23	X	6	50	52	212.43	231.38	237.74		922.4		0	9.51327	0.0737463	0.0368732	0.866519	1.34587	0	0	1.32743	0	1.32743	0	0.663717	0	8.88643	7.07965	0.147493	0	0.0368732	0	0	0	0	0.0737463	0	0.589971	0	1.10619	3.53982	0.737463	0	0	0.663717	0.70059	0.258112
339-U1387B	339-U1387B-23X-6, 75-77	U1387	B	23	X	6	75	77	212.68	231.63	237.99		922.85		0	7.21393	0.248756	0.0497512	0.124378	0.223881	0.497512	0.0497512	0.79602	0	2.88557	0.646766	0.0995025	0.0497512	2.1393	8.40796	0.895522	0	0.0497512	0	0	0	0.199005	0	1.19403	0	0	1.79104	0.845771	0.895522	1.39303	0	0.497512	0.79602	0.995025
339-U1387B	339-U1387B-23X-6, 101-103	U1387	B	23	X	6	101	103	212.94	231.89	238.25		923.33		0	1.11562	3.85396	1.08181	0	0.236646	0.574713	0	1.08181	0	1.18323	0.507099	0.0676133	0	5.03719	6.93036	0.0676133	0	0.0338066	0	1.11562	0.0338066	0.270453	0	0	0	0	7.40365	0.676133	0	1.72414	0	0.709939	0.0676133	1.48749
339-U1387B	339-U1387B-23X-7, 1-3	U1387	B	23	X	7	1	3	213.06	232.01	238.37		923.55		0.240819	3.25105	0.842866	0	0	2.16737	0.963275	0.120409	6.74293	0	3.25105	1.08368	0.240819	0.842866	3.25105	3.97351	3.07044	0	0.240819	0.240819	0.963275	0	0.240819	1.20409	0.481638	0	0	3.13064	0.481638	0.240819	2.28778	0.120409	1.68573	0	1.68573
339-U1387B	339-U1387B-23X-7, 25-27	U1387	B	23	X	7	25	27	213.3	232.25	238.61		923.98		0	11.0015	0.0758725	0.0758725	0.531108	1.74507	0.60698	0	3.18665	0	2.27618	0.758725	0.379363	0.0758725	2.42792	7.20789	1.21396	0	0.227618	0	0.60698	0.60698	0	0.0758725	0.60698	0	0	6.22155	0	2.57967	0	0.0758725	2.35205	1.28983	0.0758725
339-U1387B	339-U1387B-23X-7, 51-53	U1387	B	23	X	7	51	53	213.56	232.51	238.87		924.45		0.0563063	15.3716	0.112613	0	0.253378	1.15428	0.45045	0.0563063	6.58784	0	1.7455	1.01351	0.731982	0.0563063	3.65991	3.09685	1.7455	0	0.563063	0	0	0.0563063	0	0.168919	0.0563063	0	0	6.19369	0.563063	1.40766	0.0563063	0.112613	2.02703	0.168919	1.7455
339-U1387A	339-U1387A-24X-1, 38-40	U1387	A	24	X	1	38	40	209.18	231.02	239.23		925.1		0.103173	15.6306	0.309518	0	0.180552	0.0515863	0.82538	0	10.6784	0	2.992	0.103173	0.361104	0	3.66263	2.52773	1.96028	0	0	0.0515863	0	0.0515863	0.0515863	0	0	0	0	3.35311	0.876967	0.876967	1.23807	0	2.47614	4.07532	0.515863
339-U1387A	339-U1387A-24X-2, 4-6	U1387	A	24	X	2	4	6	209.28	231.12	239.23		925.1		0.119832	14.6195	0.958658	0.0599161	0.659077	0.119832	0.479329	0.0599161	13.3014	0	2.45656	0.898742	0.958658	0	3.3553	3.95446	0.659077	0	0.179748	0.0599161	0	0.0599161	0.0599161	0.239664	0	0	0	4.91312	1.31815	0.0599161	0.718993	0	1.31815	1.67765	0.0599161
339-U1387A	339-U1387A-24X-2, 27-29	U1387	A	24	X	2	27	29	209.51	231.35	239.46		925.52		0.0522466	11.1285	2.50784	0.522466	0.731452	0.0522466	0	0	14.6813	0	1.51515	0.15674	0.835946	0.0522466	2.2466	1.93312	0.104493	0	0	0	0	0	0.0522466	0.470219	0.417973	0	0.417973	5.90387	0.0522466	0.417973	0.15674	0.104493	0.940439	0.522466	0.470219
339-U1387A	339-U1387A-24X-2, 51-53	U1387	A	24	X	2	51	53	209.75	231.59	239.7		925.95		0.130548	8.15927	0.391645	0.130548	0.261097	0.326371	0.522193	0	7.18016	0.0652742	1.7624	0.587467	0.652742	0.0652742	5.22193	0.78329	1.50131	0	0.195822	0.0652742	0	0.0652742	0	0.522193	0	0	0	3.98172	0.0652742	1.56658	1.7624	0	1.69713	2.61097	0.718016
339-U1387A	339-U1387A-24X-2, 77-79	U1387	A	24	X	2	77	79	210.01	231.85	239.96		926.42		0.102617	9.5177	1.41098	0	1.18009	0.102617	0.436121	0.0513084	14.1611	0	0.410467	0	0.564392	0.0513084	6.33658	1.46229	0.923551	0	0.0256542	0	0.410467	0.0256542	0.0256542	0	0	0	0	2.69369	0.436121	2.05233	0	0.0256542	0.667009	1.66752	0.436121
339-U1387A	339-U1387A-24X-2, 103-105	U1387	A	24	X	2	103	105	210.27	232.11	240.22		926.89		0.0683527	10.3896	0.0683527	0	0	3.28093	0.0683527	0	9.56938	0	0.75188	0.683527	1.02529	0.0683527	1.50376	4.44293	1.09364	0	0.136705	0	0	0.0683527	0.0683527	0	0	0	0	2.66576	1.2987	1.70882	0.0683527	0	2.4607	0.205058	0.136705
339-U1387A	339-U1387A-24X-2, 126-128	U1387	A	24	X	2	126	128	210.5	232.34	240.45		927.3		0.040833	5.92078	3.18497	0	0	3.9608	0	0.040833	7.88077	0	2.65414	0.449163	0.244998	0.081666	4.04247	0.326664	0.40833	0	0.81666	0	0	0	0.040833	0	0	0.653328	0	6.73744	0	0.040833	0.040833	0	2.57248	1.67415	0.775827
339-U1387A	339-U1387A-24X-3, 1-3	U1387	A	24	X	3	1	3	210.75	232.59	240.7		927.76		0.0510465	11.0771	0.918836	0.408372	0.0510465	1.53139	0	0	13.8846	0	0.86779	0.918836	0.612557	0.102093	4.2879	3.26697	2.39918	0	0.204186	0	0	0	0	0.561511	0	0	0.408372	4.18581	0.918836	2.04186	0.918836	0	0.969883	1.32721	0
339-U1387A	339-U1387A-24X-3, 27,5-29,5	U1387	A	24	X	3	27.5	29.5	211.015	232.855	240.965		928.24		0.16488	9.56307	0.659522	0.659522	0.12366	2.55565	0	0	11.6241	0	3.54493	1.15416	1.97857	0.247321	3.79225	3.38005	0.948063	0	0	0	0	0	0.0824402	0.824402	0	0	0	1.31904	1.48392	4.03957	0.0824402	0	2.80297	0.412201	1.56636
339-U1387A	339-U1387A-24X-3, 52-54	U1387	A	24	X	3	52	54	211.26	233.1	241.21		928.68		0.070373	8.93737	0.211119	0.140746	0	8.867	1.68895	0.070373	8.79662	0.211119	1.26671	0.70373	1.47783	0.070373	6.05208	5.27797	0.140746	0	0	0	0	0	0.070373	0	0	0	0	4.92611	1.40746	1.75932	0	0.070373	3.65939	0.070373	0.562984
339-U1387A	339-U1387A-24X-3, 77-79	U1387	A	24	X	3	77	79	211.51	233.35	241.46		929.127		0	4.04749	0.863465	0.431732	0.0539665	9.76794	3.88559	0.1619	10.5235	0	2.21263	0.0539665	0.107933	0.0539665	10.9012	5.34269	0	0	0	0	0	0	0	0	0.431732	0	0	1.4571	0.431732	1.2952	0	0	0.431732	0.647598	0.971398
339-U1387A	339-U1387A-24X-3, 101-103	U1387	A	24	X	3	101	103	211.75	233.59	241.7		929.56		0	13.6364	0.826446	0.103306	0.137741	1.2741	0.0344353	0.137741	7.64463	0.103306	1.2741	0.172176	0.447658	0.344353	4.40771	1.61846	0.447658	0	0.688705	0.137741	0.585399	0.0344353	0	0.550964	0	1.10193	0	1.99725	1.10193	1.72176	0	0	4.30441	0.172176	0.792011
339-U1387A	339-U1387A-24X-3, 127-129	U1387	A	24	X	3	127	129	212.01	233.85	241.96		929.937		0	8.3696	0.267827	0	0	3.31436	3.28088	0.133914	11.1148	0	0.0669568	0.0669568	4.62002	0.0669568	5.22263	1.47305	0.468698	0	0.20087	0	0	0	0	0	0	0	0.133914	1.74088	1.07131	0.20087	0.0669568	0	1.07131	0.602611	1.74088
339-U1387A	339-U1387A-24X-4, 3-5	U1387	A	24	X	4	3	5	212.27	234.11	242.22		930.314		0.40228	18.1026	1.81026	0.670466	0.603419	4.92792	0.603419	0	14.0127	0.0670466	1.27389	0	0.469326	0	7.03989	8.31378	3.28528	0	0	0	0.0670466	0	0	1.07275	0	0.0670466	0.536373	3.08414	0	1.81026	0	0	6.63761	1.47503	0.469326
339-U1387A	339-U1387A-24X-4, 25-27	U1387	A	24	X	4	25	27	212.49	234.33	242.44		930.634		0.0970167	5.48145	5.2389	0.29105	0	5.94228	1.69779	0.436575	15.5712	0	2.71647	0.145525	0.776134	0.194033	7.90686	6.50012	1.69779	0	0	0	0.0970167	0	0.0485084	0.0485084	0	0.388067	0	1.69779	1.26122	1.11569	0	0	7.80985	1.40674	0.824642
339-U1387A	339-U1387A-24X-4, 50-52	U1387	A	24	X	4	50	52	212.74	234.58	242.69		930.996		0.0909623	10.8115	1.00058	0.0129946	0	2.57943	0.831655	0.0259892	4.70405	0	3.32662	0.155935	2.04015	0.246898	5.0549	4.76902	0.922617	0	0.571763	0.103957	0.50679	0	0.0259892	0	0	0.415827	0.441817	3.40459	0.415827	0.4808	0	0.0259892	2.6509	0.50679	1.88422
339-U1387A	339-U1387A-24X-4, 76-78	U1387	A	24	X	4	76	78	213	234.84	242.95		931.374		0.369344	4.89381	6.46353	0	0.11542	6.25577	4.43213	0.23084	6.37119	0	1.84672	0	0.369344	0.0923361	8.9566	6.7867	2.72392	0	0	0	0	0	0	0.461681	0	0.738689	0	3.37027	0.0923361	4.70914	0	0	3.60111	2.21607	1.89289
339-U1387A	339-U1387A-24X-4, 97,5-99,5	U1387	A	24	X	4	97.5	99.5	213.215	235.055	243.165		931.693		0.52161	9.538	0.111773	0	0.149031	1.30402	4.39642	0.0745156	6.11028	0	4.39642	0.186289	1.60209	0.0372578	6.25931	6.1848	1.37854	0	0.111773	0	0	0.0745156	0	0	0	0.0372578	0.0372578	4.58271	1.19225	2.01192	0	0.298063	1.86289	0.819672	1.90015
339-U1387A	339-U1387A-24X-4, 124-126	U1387	A	24	X	4	124	126	213.48	235.32	243.43		932.07		0.139018	9.96293	2.73401	0	0	0.139018	1.89991	0	4.26321	0	4.44856	0.185357	1.34384	0.0463392	3.01205	2.17794	1.71455	0	0.0463392	0	0.0926784	0	0	0	0	0	0	7.46061	0	2.22428	0	0.417053	5.18999	0	1.15848
339-U1387A	339-U1387A-24X-5, 2-4	U1387	A	24	X	5	2	4	213.76	235.6	243.71		932.76		0.358607	16.5727	2.04918	0	0.0256148	3.04816	0.845287	0.0256148	2.63832	0.409836	2.22848	0.256148	1.46004	0.461066	7.09529	7.32582	1.43443	0	0	0	0	0	0	0	0.409836	0.0256148	0.461066	3.76537	0.896516	4.55943	0	0.0512295	4.48258	1.7418	0.640369
339-U1387A	339-U1387A-24X-5, 24-26	U1387	A	24	X	5	24	26	213.98	235.82	243.93		933.302		0.177069	9.69456	2.61178	1.06242	0.0442674	1.85923	0.796813	0.0442674	5.13502	0	0.619743	0.221337	1.06242	0	7.52545	7.87959	2.1691	0	0	0	0	0	0	0	0	0	0.0442674	2.87738	0.708278	4.38247	0	0.442674	5.48915	0.619743	0.84108
339-U1387A	339-U1387A-24X-5, 53-55	U1387	A	24	X	5	53	55	214.27	236.11	244.22		934.017		0.216685	13.4886	1.02925	0	0.162514	3.35861	0.433369	0.108342	6.7714	0.0541712	1.19177	0.541712	0.379198	0	7.31311	14.0845	2.65439	0	0	0	0	0.866739	0	0	0	0	0	3.46696	0.92091	2.97941	0	0.0541712	6.28386	0.216685	0.975081
339-U1387A	339-U1387A-24X-5, 76-78	U1387	A	24	X	5	76	78	214.5	236.34	244.45		934.584		0.0865301	13.989	2.79781	0.461494	0	8.88376	0	0.951832	0.0865301	0.461494	0.17306	6.5186	10.7586	1.38448	0.115374	1.47101	0.403807	0	0	0	0	0.0576868	0	0	0	0	0	7.58581	0.490337	1.96135	0	4.15345	0.865301	0.576868	0.0576868
339-U1387A	339-U1387A-24X-5, 103-105	U1387	A	24	X	5	103	105	214.77	236.61	244.72		935.249		0	10.5378	0.0726744	0	0	8.43023	3.48837	2.10756	13.9535	0.145349	0.145349	0.218023	0.218023	0	4.06977	7.04942	1.96221	0	0	0	0	0	0	0	0	1.16279	0	2.39826	1.38081	1.81686	0	0	0.872093	0.0726744	0.944767
339-U1387A	339-U1387A-24X-5, 126-128	U1387	A	24	X	5	126	128	215	236.84	244.95		935.734		0.328228	9.91977	0.0364697	0.0364697	0.0364697	1.34938	0.875274	0	2.11524	0	2.407	0.0364697	1.13056	0.765864	2.66229	6.16338	1.85996	0	0.145879	0.0729395	0	0	0	0	0	0.328228	0	3.6105	0.328228	0.911743	0	2.07877	0.802334	1.2035	0.729395
339-U1387B	339-U1387B-24X-2, 72-74	U1387	B	24	X	2	72	74	215.12	236.96	245.07		935.949		0.292683	11.0244	0	0	0	4.4878	0.390244	0	4.4878	0	0.487805	0.390244	1.85366	0	2.82927	5.26829	1.46341	1.65854	0	0	0	0	0	0	0	0	0.878049	5.85366	0.878049	2.2439	0.780488	0.292683	1.26829	0.487805	1.46341
339-U1387B	339-U1387B-24X-2, 99,5-101,5	U1387	B	24	X	2	99.5	101.5	216.495	236.625	245.345		936.449		0	11.2105	0.0596303	0.477042	0.119261	1.49076	0	0	3.04114	0	0.357782	0.178891	0.775194	0.0596303	4.23375	12.4031	0.417412	11.9261	0	0	0	0	0	0	0	0	0.119261	6.44007	1.13298	2.20632	0.357782	0.178891	1.07335	1.13298	2.14669
339-U1387B	339-U1387B-24X-2, 125,5-127,5	U1387	B	24	X	2	125.5	127.5	216.755	236.885	245.605		936.913		0	20.0258	0.0645995	0	0.549096	0.193798	0	0	2.06718	0	0	0.0322997	0	0	3.35917	5.55556	0.678295	15.1163	0	0	0	0	0	0	0	0	0.807494	6.16925	1.06589	0.193798	0	0.0968992	0.0968992	1.61499	0.613695
339-U1387B	339-U1387B-24X-2, 140-142	U1387	B	24	X	2	140	142	216.9	237.03	245.75		937.164		0	17.1975	1.9924	0	1.97929	0.629178	0	0	0.524315	0	0.209726	0	0	0.524315	3.35562	12.8719	0.314589	14.9954	0	0	0	0	0	0	0	0.419452	0.209726	9.6474	0.629178	1.9924	0	0.838904	1.04863	0.943767	2.51671
339-U1387B	339-U1387B-24X-3, 1-3	U1387	B	24	X	3	1	3	217.01	237.14	245.86		937.36		0	22.38	1.72154	0.86077	1.35571	1.89369	0.344308	0	0.516462	0	0	0.172154	0	0	2.41016	12.2229	1.37723	11.19	0	0	0	0	0	0	0	0	0.344308	9.12417	0.516462	0.516462	0	0.516462	0.172154	0.688616	0.688616
339-U1387B	339-U1387B-24X-3, 23-25	U1387	B	24	X	3	23	25	217.23	237.36	246.08		937.753		0	14.4949	0.938791	0.319189	0.844912	1.35186	0.0187758	0	1.87758	0	0.0375516	0.0751033	0	0.0751033	4.18701	7.79196	0.375516	5.42621	0	0	0	0	0	0	0	0	0.131431	2.55351	1.25798	0.112655	0.300413	0.45062	0.0751033	2.15922	0.0563275
339-U1387B	339-U1387B-24X-3, 50-52	U1387	B	24	X	3	50	52	217.5	237.63	246.35		938.235		0	21.8264	0.899343	0.0691802	1.07229	2.49049	0	0	0	0	0	0.242131	0	0	4.01245	6.88343	0.276721	10.1003	0	0	0	0	0	0	0	0	0	5.29229	0	1.72951	0	0	0.933933	0.0691802	0
339-U1387B	339-U1387B-24X-3, 72-74	U1387	B	24	X	3	72	74	217.72	237.85	246.57		938.628		0	15.4807	0.0402793	0.429646	2.69871	3.0478	0	0	3.43716	0	0	0.120838	0.0402793	0	3.69227	8.39151	0.872718	0.429646	0	0	0	0	0	0	0	0	0.429646	9.07626	0.0402793	0.93985	0	0.0402793	1.06069	0	0.0402793
339-U1387B	339-U1387B-24X-3, 103-105	U1387	B	24	X	3	103	105	218.03	238.16	246.88		939.182		0.063012	7.68746	0.031506	0.535602	0.031506	2.96156	1.51229	5.35602	10.586	0.031506	1.0397	0	0.661626	0	7.15186	6.08066	2.0794	2.55198	0	0	0	0	0	0	0.504096	0	0.504096	2.83554	0	4.15879	0	0	3.74921	0.598614	0.567108
339-U1387B	339-U1387B-24X-3, 127-129	U1387	B	24	X	3	127	129	218.27	238.4	247.12		939.611		0.113464	6.1649	0.075643	1.85325	0.642965	2.00454	0.642965	3.177	9.83359	0.605144	0.680787	0.680787	2.30711	0	9.26626	5.67322	1.81543	3.85779	0	0	0	0	0	0	0	0	0	1.39939	0	8.54766	0	0.075643	4.42511	0.983359	2.49622
339-U1387B	339-U1387B-24X-4, 3-5	U1387	B	24	X	4	3	5	218.53	238.66	247.38		940.076		0.0454167	9.65862	0.227083	0	0	4.79146	0	0.0908334	9.24987	0	0.0908334	0.0454167	3.33056	0	11.7326	2.64931	4.82931	5.55598	0	0	0	0	0	0	0	0.0454167	0.529861	1.1657	0	4.11778	0	0.0454167	7.52403	0.590417	2.95209
339-U1387B	339-U1387B-24X-4, 16-18	U1387	B	24	X	4	16	18	218.66	238.79	247.51		940.308		0.124127	7.44763	0.186191	0	0	1.48953	2.0481	0.0620636	5.4616	0	1.11715	0	8.00621	0	0.993018	5.83398	7.7114	3.59969	0	0	0	0	0	0	0	0.0620636	0	0.744763	0.993018	4.34445	0.0620636	0.124127	3.10318	1.55159	1.24127
339-U1387B	339-U1387B-24X-4, 29-31	U1387	B	24	X	4	29	31	218.79	238.92	247.64		940.54		0.121803	6.21194	0	0	0	1.46163	3.24807	1.38043	4.5879	0	0.649614	0	4.91271	0	19.6508	3.04507	2.15185	3.28867	0	0	0	0	0	0	0	0	0.0406009	0.44661	0	5.88713	0	0.0812018	4.3443	1.62404	2.15185
339-U1387B	339-U1387B-24X-4, 41,5-43,5	U1387	B	24	X	4	41.5	43.5	218.915	239.045	247.765		941.051		0.287494	6.03737	0.0958313	0	0	0	1.14998	0	3.0666	0	0.287494	0	3.92908	0.0958313	10.6373	4.40824	7.23527	3.54576	0.383325	0	0.0958313	0	0	0	0	0.191663	0.383325	2.68328	0	4.12075	0	0.0958313	3.83325	3.16243	2.87494
339-U1387B	339-U1387B-24X-4, 54-56	U1387	B	24	X	4	54	56	219.04	239.17	247.89		941.522		0.936768	4.77752	0	0.28103	0	0	1.87354	0	5.71429	0	1.03044	0	4.77752	0	10.0234	5.43326	6.32319	7.96253	0	0	0	0	0	0	0	0	0	3.27869	0	2.62295	0	0	6.55738	1.49883	1.87354
339-U1387B	339-U1387B-24X-4, 79,5-81,5	U1387	B	24	X	4	79.5	81.5	219.295	239.425	248.145		942.543		0.787815	8.87605	0.0787815	0.49895	0.49895	3.44013	0	0	2.17962	0	1.83824	0.0787815	1.54937	0	11.6597	6.01366	2.80987	6.30252	0	0	0	0	0	0	0	0	0.0787815	2.28466	1.2605	3.07248	0	0	8.61345	3.125	0.997899
339-U1387B	339-U1387B-24X-4, 102-104	U1387	B	24	X	4	102	104	219.52	239.65	248.37		943.407		0.577293	9.81398	0.128287	0.577293	0	3.20718	0.0641437	0	1.53945	0	1.66774	0.0641437	3.01475	0	11.9307	8.53111	3.5279	5.70879	0	0	0	0	0	0	0	0	1.21873	3.27133	0.641437	2.56575	0	0	6.22194	1.79602	0.128287
339-U1387B	339-U1387B-24X-4, 127-129	U1387	B	24	X	4	127	129	219.77	239.9	248.62		944.389		0.837521	10.804	0.41876	0	0.0837521	1.80067	0.670017	0.335008	2.68007	0	0.795645	0.041876	2.38693	0	11.6415	11.8509	1.96817	5.02513	0	0	0	0	0	0	0	0.335008	0.0837521	4.10385	1.08878	2.34506	0	0.041876	8.9196	2.42881	0.041876
339-U1387B	339-U1387B-24X-5, 2-4	U1387	B	24	X	5	2	4	220.02	240.15	248.87		945.371		1.22818	10.989	0	0	0.581771	2.77957	0	0	4.65417	0	1.55139	0	2.32708	0	9.30834	8.40336	0.711054	6.78733	0	0	0	0	0	0	0	0.51713	1.03426	1.16354	3.16742	2.06852	0	0	5.68843	2.9735	0
339-U1387B	339-U1387B-24X-5, 26,5-28,5	U1387	B	24	X	5	26.5	28.5	220.265	240.395	249.115		946.353		0.880759	9.28184	0	0	0.203252	1.01626	0	0	3.25203	0	1.08401	0.0677507	0.948509	0	10.2981	8.60434	5.55556	10.5014	0	0	0	0	0	0	0	0.0677507	1.08401	3.79404	0.542005	3.38753	0	0	6.09756	0.745257	0.0677507
339-U1387B	339-U1387B-24X-5, 49-51	U1387	B	24	X	5	49	51	220.49	240.62	249.34		947.217		0.467563	12.0397	0	0	0.116891	1.16891	0.409117	0	2.10403	0	1.46113	0.0584454	1.69492	0	6.42899	8.64991	2.80538	12.3904	0	0	0	0	0	0	0	0	1.11046	4.96786	0.409117	2.04559	0.0584454	0	3.68206	0.467563	0
339-U1387B	339-U1387B-24X-5, 76-78	U1387	B	24	X	5	76	78	220.76	240.89	249.61		948.277		0.308737	12.6582	0	0	0.277864	0.802717	0.370485	0	2.09941	0	0.24699	0	0.24699	0	5.06329	7.10096	1.60543	14.0167	0	0	0	0	0	0	0	0	1.66718	12.473	0	3.76659	0	0.49398	4.87805	0.123495	0
339-U1387B	339-U1387B-24X-5, 102-104	U1387	B	24	X	5	102	104	221.02	241.15	249.87		949.298		0.111669	9.3244	0	0	0.167504	0.0558347	1.61921	0.0558347	0.0558347	0	0	0.111669	0	0	2.45673	9.10106	0.223339	17.7554	0	0	0	0	0	0	0	0	1.17253	26.4098	0.0558347	2.23339	0	0.111669	0.614182	0.502513	0
339-U1387B	339-U1387B-24X-5, 124,5-126,5	U1387	B	24	X	5	124.5	126.5	221.245	241.375	250.095		950.202		0.0603865	16.6667	0	0	1.14734	0.120773	3.68357	0.120773	1.08696	0	0	0	0	0	5.3744	8.57488	14.8551	0	0	0	0	0	0	0	0	0	0	27.4758	0.0603865	0.120773	0	0.0603865	0.120773	0	0
339-U1387B	339-U1387B-24X-6, 3-5	U1387	B	24	X	6	3	5	221.53	241.66	250.38		951.301		0	2.03974	0	1.16054	1.01987	0.474767	1.89907	0	1.40672	0	0.0351679	0.0351679	0	0	3.55196	11.1482	0.0351679	16.3883	0	0	0	0	0	0	0	0.281343	0.351679	15.4036	0.562687	0.351679	0	0	0	0	0.597855
339-U1387B	339-U1387B-24X-6, 26-28	U1387	B	24	X	6	26	28	221.76	241.89	250.61		952.205		0	15.8458	0.142755	1.21342	0.142755	2.14133	2.42684	0	0.0713776	0	0	0	0	0	6.13847	8.63669	0.0713776	15.4176	0	0	0	0	0	0	0.571021	0	1.35617	8.20842	0	0.642398	0	0	0	1.21342	0
339-U1387B	339-U1387B-24X-6, 50-52	U1387	B	24	X	6	50	52	222	242.13	250.85		953.147		0	18.1917	0	0.86627	1.08284	2.54467	0.487277	0.0541419	2.59881	0.433135	0	0	0	0.433135	4.16892	7.68814	0	24.3638	0	0	0	0	0	0	0	0	0.541419	5.3059	0.433135	0.0541419	0	0	0	1.0287	0.162426
339-U1387B	339-U1387B-24X-6, 74-76	U1387	B	24	X	6	74	76	222.24	242.37	251.09		954.09		0	22.7273	0	4.662	1.45688	1.22378	0.11655	0.174825	0.4662	0.4662	0.0582751	0	0.4662	0	5.12821	10.373	0.0582751	18.8811	0	0	0	0	0	0	0	0	0	3.55478	0	0.0582751	0	0	0	1.34033	0
339-U1387B	339-U1387B-24X-6, 99-101	U1387	B	24	X	6	99	101	222.49	242.62	251.34		955.072		0	24.4093	0.0679925	0.0679925	5.33741	4.02856	0.0679925	0	1.08788	0.27197	0	0	0	0	6.18732	9.45096	0	10.4029	0	0	0	0	0	0	0	0	0.135985	3.05966	0.27197	0.407955	0	0	0	1.97178	0.475948
339-U1387B	339-U1387B-24X-7, 22-24	U1387	B	24	X	7	22	24	222.74	242.87	251.59		956.054		0	26.4186	0.0625293	2.6575	2.21979	1.04737	0.781616	1.03173	4.06441	0	0	0	0	0	6.00281	11.6617	0.0312647	3.56417	0	0	0	0	0	0	0	0	0.687822	1.81335	0	1.81335	0	0	0	0.562764	1.5945
339-U1387B	339-U1387B-24X-7, 43,5-45,5	U1387	B	24	X	7	43.5	45.5	222.955	243.085	251.805		956.918		0	34.3062	0	0.602523	0	1.1109	3.27622	1.09207	6.66541	0	0	0	0	0	3.08793	10.0546	0	3.01262	0	0	0	0	0	0	0	0.301262	0.376577	0.0753154	0	2.59838	0	0	0.301262	0.338919	1.31802
339-U1387B	339-U1387B-24X-CC, 3-5	U1387	B	24	X	CC	3	5	223.16	243.29	252.01		957.703		0	22.3622	0	0	0.160879	6.70331	2.57407	4.451	10.4035	0	0.429012	0	0	0	5.68441	5.4699	0.147473	5.14814	0	0	0	0	0	0	0	0	0.482638	0.429012	0	1.76967	0	0	0.0536265	0	1.55517
339-U1387B	339-U1387B-24X-CC, 11-13	U1387	B	24	X	CC	11	13	223.24	243.37	252.09		958.017		0	24.5135	0	0	0.0580889	4.29858	1.16178	2.55591	15.3936	0	0	0	0	0	5.80889	7.92913	0	2.614	0	0	0	0	0	0	0	0	0.174267	0	0	1.68458	0	0	0	0.290444	1.39413
339-U1387B	339-U1387B-24X-CC, 15-17	U1387	B	24	X	CC	15	17	223.28	243.41	252.13		958.174		0.0275482	33.3609	0	0	0.137741	3.55372	2.2314	4.13223	14.9862	0	0	0.0826446	0	0	3.0854	6.8595	0.137741	2.20386	0	0	0	0	0	0	0	0	0.0275482	0.0550964	0.0275482	2.3416	0	0	0	0	0.798898
339-U1387B	339-U1387B-24X-CC, 21-23	U1387	B	24	X	CC	21	23	223.34	243.47	252.19		958.41		0	30.6531	0	0.0755002	2.26501	0.679502	0	5.66251	25.3681	2.41601	0	0.377501	0.604002	0	5.28501	6.07777	0	0.151	0	0	0	0	0	0	0	0	0	0.302001	0.604002	0.302001	0	0.0755002	0	0	0.151
339-U1387B	339-U1387B-24X-CC, 26-28	U1387	B	24	X	CC	26	28	223.39	243.52	252.24		958.54		0	18.2932	0	0	0.272356	1.08942	0.726282	6.44576	33.0912	0	1.08942	0	0	0	4.63005	5.76487	0.0453926	1.13482	0	0	0	0	0	0	0	0	0	1.04403	0.408534	1.63414	0	0	0	0.0453926	0.0453926
339-U1387A	339-U1387A-25X-1, 27-29	U1387	A	25	X	1	27	29	218.67	241.68	252.41		958.983		0	21.8303	0	1.59734	0.78203	0.63228	0	0	2.66223	0	1.13977	0.274542	0.199667	0	7.19634	9.3594	0.657238	10.9484	0	0	0	0	0	0	0	0	0.0249584	1.58902	0.582363	0.657238	0.557404	0.0249584	1.13977	0.707155	0.0499168
339-U1387A	339-U1387A-25X-1, 39-40,5	U1387	A	25	X	1	39	40.5	218.79	238.92	252.53		959.296		0	21.5129	0.437254	0	0	0.393529	2.62352	0	0.787057	0	0.349803	1.22431	1.66157	0	3.14823	12.3306	0.0874508	11.4561	0	0	0	0	0	0	0	0	0	3.84784	0.437254	0.612156	0.437254	0	2.88588	0	2.44862
339-U1387A	339-U1387A-25X-1, 52-54	U1387	A	25	X	1	52	54	218.92	241.93	252.66		959.635		0	21.0586	0.114036	0	0	0.142545	0.456144	0.038012	1.36843	0	2.5468	0.038012	1.10235	0	1.97662	2.16668	0.0760239	19.3101	0	0	0	0	0	0	0.456144	0	0.0760239	3.00295	0.532168	0.038012	0.038012	0.038012	0.0760239	0	1.36843
339-U1387A	339-U1387A-25X-1, 77-79	U1387	A	25	X	1	77	79	219.17	242.18	252.91		960.286		0	21.8251	0.0760456	0	0.0760456	0.380228	0.684411	0.0760456	1.21673	0	0.152091	0.152091	0.760456	0.760456	3.19392	6.53992	0.152091	6.84411	0.0760456	0.0760456	0	0	0	0	0.228137	0	0.608365	6.08365	0.684411	0.0760456	0.0760456	0.228137	1.59696	0.0760456	0.152091
339-U1387A	339-U1387A-25X-1, 101-103	U1387	A	25	X	1	101	103	219.41	242.42	253.15		960.911		0	18.9514	0.0631712	0	0	0.189514	0	0	0.0631712	0	1.01074	0.50537	0.631712	0.126342	2.71636	9.03348	0.0631712	13.9608	1.01074	0	0	0	0	0	0	0	0	1.57928	2.02148	0	0	0	2.46368	0	1.70562
339-U1387A	339-U1387A-25X-1, 127-129	U1387	A	25	X	1	127	129	219.67	242.68	253.41		961.617		0	23.0716	0.0694927	0	0	1.11188	0	0.138985	1.32036	0	0.138985	0.0694927	3.12717	0.277971	1.8763	10.7714	0.0694927	13.3426	0.833912	0	0	0	0	0	0	0	0.555942	0.694927	0.555942	0.208478	0	2.22377	6.04587	0.208478	2.01529
339-U1387A	339-U1387A-25X-2, 3-5	U1387	A	25	X	2	3	5	219.93	242.94	253.67		962.35		0	13.8598	0.313808	0.523013	0.0523013	0.523013	0	0.313808	1.77824	0.0523013	1.51674	0.41841	2.30126	0.575314	6.06695	10.1987	0.732218	8.4728	1.09833	0	0.83682	0	0	0	0	0	0.104603	3.08577	0.104603	0	0.83682	1.67364	5.75314	0	1.04603
339-U1387A	339-U1387A-25X-2, 29-31	U1387	A	25	X	2	29	31	220.19	243.2	253.93		963.083		1.96312	33.7894	0	2.37954	0	0.178465	0	0	0	0	0.475907	0.654372	0.892326	0.118977	4.16419	8.68531	1.96312	5.94884	0	0	0.0594884	0	0	0	0	0	0	0.951814	0.475907	0.0594884	0	0.0594884	3.98572	0.535396	0.35693
339-U1387A	339-U1387A-25X-2, 51-53	U1387	A	25	X	2	51	53	220.41	243.42	254.15		963.704		0.0535906	10.9325	0.0535906	7.44909	0.589496	0.643087	1.28617	0	0.91104	0	1.01822	0.267953	0.803859	0.0535906	3.69775	16.0772	3.00107	10.1822	0	0	0	0	0	0	0	0	0.0535906	0.803859	0.535906	0.160772	0.482315	0.321543	2.09003	0.0535906	0.267953
339-U1387A	339-U1387A-25X-2, 62,5-64,5	U1387	A	25	X	2	62.5	64.5	220.525	243.535	254.265		964.042		0	5.3012	0.20654	0	0.0688468	1.44578	0	0	3.30465	0	2.82272	0.344234	4.61274	0.413081	5.3012	12.1515	0.757315	18.5886	0.20654	0	0	0	0	0	0	0	0.619621	4.47504	0	0.757315	0	0.20654	3.99312	0.137694	1.92771
339-U1387A	339-U1387A-25X-2, 77-79	U1387	A	25	X	2	77	79	220.67	243.68	254.41		964.437		0	2.07529	0.0965251	2.46139	0.0482625	0.0482625	1.83398	0	0	0	1.9305	0.289575	0.675676	0.144788	3.76448	22.1042	0	16.4093	0	0	0	0	0	0	0	0.579151	0.675676	1.68919	1.1583	0.0965251	0	0	0.0965251	0	0
339-U1387A	339-U1387A-25X-2, 106-108	U1387	A	25	X	2	106	108	220.96	243.97	254.7		965.255		0	5.1412	0.398262	4.27227	0	0.108617	0.868936	1.81028	2.38957	0.289645	1.59305	0.0724113	2.24475	0	5.50326	15.1702	1.08617	6.98769	0.0362056	0	0	0	0	0	0.289645	0	0.57929	2.28096	0.0362056	0.724113	0	0.398262	3.11369	0.57929	1.23099
339-U1387A	339-U1387A-25X-2, 125-127	U1387	A	25	X	2	125	127	221.15	244.16	254.89		965.79		0.126502	4.52245	0.126502	3.16256	0.0316256	0.126502	0	0.126502	2.56167	0	1.20177	0.0632511	0.0948767	0.0316256	6.26186	19.4813	1.04364	11.2587	0	0	0	0	0	0	0	0.537634	0	3.79507	2.02404	0.0948767	0.537634	0	3.92157	0.885515	1.64453
339-U1387A	339-U1387A-25X-3, 2-4	U1387	A	25	X	3	2	4	221.42	244.43	255.16		966.552		0.0857265	3.81483	2.1003	5.015	0.0428633	0.0428633	0	0.728676	1.37162	0	0.385769	0.12859	2.40034	0	9.30133	19.8886	1.88598	7.02958	0	0	0	0	0	0	0	0.685812	0.0428633	3.00043	0.728676	1.45735	2.31462	0.0857265	1.2859	1.37162	1.84312
339-U1387A	339-U1387A-25X-3, 27-29	U1387	A	25	X	3	27	29	221.67	241.8	255.41		967.257		0.0442478	5.84071	0	2.92035	0	1.15044	0.707965	0	4.69027	0.353982	0.929204	0.0442478	2.38938	0	12.8761	13.4513	3.00885	6.76991	0	0	0	0	0	0	0	0.353982	0.0442478	6.19469	1.41593	1.76991	1.06195	0	2.65487	1.15044	2.30088
339-U1387A	339-U1387A-25X-3, 52-54	U1387	A	25	X	3	52	54	221.92	244.93	255.66		967.962		0.0924214	3.28096	0.415896	5.82255	0.0462107	0.184843	0	0.0462107	1.52495	0.369686	2.26433	0.0462107	1.94085	0.554529	9.51941	13.7708	3.69686	6.28466	0.415896	0	0	0	0.0462107	0	0	0.138632	0.369686	4.02033	0	3.4658	0.739372	0.0924214	4.80591	1.84843	1.52495
339-U1387A	339-U1387A-25X-3, 77,5-79,5	U1387	A	25	X	3	77.5	79.5	222.175	245.185	255.915		968.695		0.0706964	7.49381	0.0706964	1.87345	0	1.16649	1.13114	0	1.13114	0	1.59067	0	1.34323	0.106045	11.0286	19.3708	2.19159	7.42312	0.0706964	0	0.0353482	0	0	0	0	0.0353482	0	2.9339	0.742312	1.13114	0.0706964	0	2.9339	1.66136	3.0046
339-U1387A	339-U1387A-25X-3, 102-104	U1387	A	25	X	3	102	104	222.42	245.43	256.16		969.372		0.182232	7.15262	0.0455581	1.18451	0	1.68565	1.64009	0	1.09339	0	1.50342	0	2.09567	0	11.2528	18.1777	1.59453	6.56036	0	0	0	0	0	0	0	0.0455581	0	4.7836	1.13895	0.911162	0.637813	0	4.73804	0.410023	1.77677
339-U1387A	339-U1387A-25X-3, 125-127	U1387	A	25	X	3	125	127	222.65	245.66	256.39		970.021		0.183262	5.13134	0.0610874	0	0.0610874	2.01588	2.44349	0	1.52718	0	1.22175	0	0.91631	0.488699	4.64264	15.4551	1.34392	10.0794	0	0	0	0.0610874	0	0	0	0	0	2.26023	0.977398	2.13806	0.488699	0	5.62004	0.733048	2.62676
339-U1387A	339-U1387A-25X-4, 1-3	U1387	A	25	X	4	1	3	222.91	245.92	256.65		970.754		0	2.88967	0.0291886	1.07998	0	0.145943	0.467017	0	2.83129	0	1.13835	0	1.10917	0.175131	3.35668	13.8062	2.01401	9.60304	0.700525	0.0583771	0	0.0583771	0	0	0	0	0	3.47344	1.86807	3.44425	0	0.0291886	2.10158	0.20432	0.788091
339-U1387A	339-U1387A-25X-4, 76-78	U1387	A	25	X	4	76	78	223.66	246.67	257.4		972.869		0	11.3225	0.281889	5.26192	0.563777	0.681231	0.0469814	0	1.50341	0	1.45642	0.375852	0.140944	0	1.69133	8.78553	2.0202	20.0141	0	0	0	0	0	0	0	0	0.516796	6.06061	0	1.22152	0	0.0939629	0.140944	1.22152	0
339-U1387A	339-U1387A-25X-4, 102-104	U1387	A	25	X	4	102	104	223.92	246.93	257.66		973.602		0	13.035	1.49142	5.01119	0.0894855	0.909769	0.268456	0.298285	7.90455	0.238628	0.357942	0.0894855	0.507084	0.0298285	0.656227	6.41312	0.477256	15.5705	0	0	0	0	0	0	0	0	0.059657	5.30947	2.05817	1.2528	0.238628	0	0.0298285	0.149142	0.238628
339-U1387A	339-U1387A-25X-4, 126-128	U1387	A	25	X	4	126	128	224.16	247.17	257.9		974.279		0	16.7841	0	5.3787	0.664237	1.20697	0.0486027	0	5.23289	0	0.437424	0.0486027	0.664237	0.291616	0.0486027	5.36249	0.0972053	13.0579	0	0	0	0	0	0	0	0	0	4.71446	0.664237	0.0486027	0.664237	0	0.0486027	1.55529	0.567031
339-U1387B	339-U1387B-25X-1, 50-52	U1387	B	25	X	1	50	52	224.1	247.35	258.08		974.787		0	7.70074	5.91642	0.313038	0.876506	0.641728	0.0156519	0.0156519	0.500861	0.0156519	0.109563	0.0313038	0	0.0156519	0.766943	5.50947	0.0156519	19.5805	0	0	0	0	0	0	0	0	0.25043	1.81562	0.0469557	1.03303	0.109563	0	0	1.11129	0
339-U1387B	339-U1387B-25X-1, 76-78	U1387	B	25	X	1	76	78	224.36	247.61	258.34		975.52		0	7.12247	10.9691	1.3153	1.11056	1.95434	0.24817	0	1.41457	0.198536	0.297804	0.0992679	0.0496339	0.148902	2.6306	10.0261	0.0744509	12.9793	0	0	0	0	0	0	0	0	0	2.85395	1.09195	0.421889	0.372255	0	0	0.744509	0
339-U1387B	339-U1387B-25X-1, 103-105	U1387	B	25	X	1	103	105	224.63	247.88	258.61		976.282		0	19.0754	1.38333	1.49254	0.87368	2.51183	1.71096	0.291227	2.05679	0	0.0364033	0.0182017	0.0364033	0	2.29341	9.02803	0	13.9789	0	0	0	0	0	0	0	0	0.0182017	1.58355	0.054605	0.600655	0.728067	0	0.0182017	0.0364033	0.364033
339-U1387B	339-U1387B-25X-1, 127-129	U1387	B	25	X	1	127	129	224.87	248.12	258.85		977.05		0	0	4.04215	13.7433	5.77451	2.23762	3.00274	1.38588	0.34647	5.42804	0	0	0	0	2.42529	11.8377	0	11.4335	0	0	0	0	0	0	0	0	0	0.692941	0	0.34647	0.11549	0	0.23098	2.19431	0.34647
339-U1387B	339-U1387B-25X-2, 4-6	U1387	B	25	X	2	4	6	225.14	248.39	259.12		978.018		0	18.9009	0.666112	0	1.66528	4.66278	0.666112	0	5.66195	0	0	0	0.832639	0	3.08077	8.82598	0.166528	4.99584	0	0	0	0	0	0	0	0	0.0832639	2.9975	1.74854	2.66445	0	0.0832639	1.99833	1.33222	2.58118
339-U1387B	339-U1387B-25X-2, 24,5-26,5	U1387	B	25	X	2	24.5	26.5	225.345	248.595	259.325		978.771		0	9.97433	16.4283	0	1.28346	3.81371	0.440044	0	1.17345	0	0	0	0.880088	0	1.76018	13.4947	0.733407	10.2677	0	0	0	0	0	0	0	0	0.586725	2.3469	2.20022	0.733407	0	0.146681	0.146681	1.46681	0.146681
339-U1387B	339-U1387B-25X-2, 53,5-55,5	U1387	B	25	X	2	53.5	55.5	225.635	248.885	259.615		979.811		0	1.83186	12.1034	1.30847	1.93	2.15898	1.96271	0.0654236	4.25254	0	0	0.0654236	0.0654236	0	4.18711	11.3183	0	10.9912	0	0	0	0	0	0	0	0	0.0654236	3.07491	0	0.0654236	0.981354	0.0654236	0.196271	2.42067	0.981354
339-U1387B	339-U1387B-25X-2, 77-79	U1387	B	25	X	2	77	79	225.87	249.12	259.85		980.635		0	1.94253	15.864	1.61878	1.69972	4.57305	0.485633	0	1.29502	0	0	0.161878	0.0809389	0	3.39943	20.2347	0.0809389	4.20882	0	0	0	0	0	0	0	0	0	2.99474	0	0.0809389	0.485633	0	0.0809389	0.809389	0
339-U1387B	339-U1387B-25X-2, 102-104	U1387	B	25	X	2	102	104	226.12	249.37	260.1		981.532		0.0447027	3.03979	5.09611	1.654	0	2.59276	0.715244	0	11.131	0	2.23514	0.98346	2.68216	0.134108	1.51989	9.34287	13.1873	0.402325	0	0	0	0	0	0	0	0.0447027	0.715244	3.2633	0	0.849352	0	0	0.625838	0.849352	0.178811
339-U1387B	339-U1387B-25X-2, 125-127	U1387	B	25	X	2	125	127	226.35	249.6	260.33		982.356		0.0329761	1.97857	6.85903	0.560594	0	2.78648	0.527617	0	7.15581	0	0.725474	0.0659522	2.17642	0.659522	0.659522	16.2242	0.692498	7.48557	0.659522	0.0329761	0	0	0.0329761	0	0	0.0329761	0	2.2094	1.08821	1.08821	0.0659522	0.0659522	4.15499	2.40725	0.329761
339-U1387B	339-U1387B-25X-3, 3-5	U1387	B	25	X	3	3	5	226.63	249.88	260.61		983.36		0.0464199	6.68446	0.649878	0.371359	0	0.754323	0.371359	0	8.77335	0	1.85679	0	2.27457	0.835558	3.43507	8.26274	3.29581	5.75606	0.928397	0.0464199	0	0	0	0	0.0464199	0	0	1.43902	0.417779	0.881977	0.13926	0	2.27457	1.6247	1.85679
339-U1387B	339-U1387B-25X-3, 25,5-27,5	U1387	B	25	X	3	25.5	27.5	226.855	250.105	260.835		984.642		0	1.26103	11.8537	1.19798	0.0630517	1.38714	0	0	7.81841	0	0.819672	0.189155	1.7024	0.0630517	10.4035	10.0252	2.08071	9.3947	0.126103	0	0	0	0	0	0	0	0.126103	2.83733	0	0.504414	0.315259	0.0630517	0.504414	4.53972	0.75662
339-U1387B	339-U1387B-25X-3, 52-54	U1387	B	25	X	3	52	54	227.12	250.37	261.1		986.091		0.0379939	0.531915	8.32067	0.569909	0.0379939	3.53343	0.911854	0.0379939	8.96657	0	0.227964	0.227964	2.43161	0.379939	7.10486	5.50912	1.06383	8.32067	0.151976	0	0.0379939	0	0.0379939	0	0	0.0379939	0.0379939	2.96353	1.59574	1.8617	0	0.113982	0.645897	2.88754	0.531915
339-U1387B	339-U1387B-25X-3, 75-77	U1387	B	25	X	3	75	77	227.35	250.6	261.33		987.07		0.0371471	1.78306	8.09807	0.408618	0	1.78306	0.89153	0	2.71174	0	1.00297	0.0371471	0.26003	0	8.20951	8.80386	1.44874	5.49777	0.0742942	0	0.0742942	0.0371471	0.0371471	0	0	0.297177	0.0371471	4.23477	0.965825	1.52303	0.854383	0.0371471	2.56315	1.52303	1.93165
339-U1387B	339-U1387B-25X-3, 100-102	U1387	B	25	X	3	100	102	227.6	250.85	261.58		987.774		0.111359	17.8174	2.00445	0.111359	0	0.668151	0.890869	0	2.67261	0	1.11359	0.222717	0.111359	0	1.22494	5.23385	1.11359	0.111359	0.111359	0	0	0	0	0	0	0.222717	0	8.57461	3.56347	3.00668	0.111359	0	2.33853	2.11581	3.00668
339-U1387B	339-U1387B-25X-3, 138-140	U1387	B	25	X	3	138	140	227.98	251.23	261.96		988.844		0.316049	8.37531	1.81728	0.0790123	0	0.671605	0	0	5.92593	0	2.5284	0.316049	0.553086	0.237037	19.2	15.1704	5.3037	6.79506	0.0790123	0	0.474074	0	0	0	0	0	0.0790123	1.42222	0	1.02716	0	0	0	0.632099	0.158025
339-U1387B	339-U1387B-25X-4, 27-29	U1387	B	25	X	4	27	29	228.37	251.62	262.35		989.943		0.709677	0.451613	1.35484	7.29032	0.193548	0.0645161	0	0	2.25806	0	1.41935	0.83871	3.41935	0.645161	7.22581	15.8065	4.96774	6.45161	0.387097	0	0.193548	0.0645161	0.129032	0	0	0	0.322581	5.67742	0.193548	3.41935	0.193548	0.193548	1.80645	4.06452	0.387097
339-U1387B	339-U1387B-25X-4, 52-54	U1387	B	25	X	4	52	54	228.62	251.87	262.6		990.647		0.178253	0.653595	1.30719	0.653595	0	2.49554	0.475342	0	1.90137	0	1.72311	0.178253	2.19846	0.594177	7.90255	10.3981	2.31729	7.66488	0.118835	0	0.0594177	0	0	0	0	0	0	13.5472	0.534759	2.43613	0	0.0594177	3.26797	1.12894	0
339-U1387B	339-U1387B-25X-4, 78-80	U1387	B	25	X	4	78	80	228.88	252.13	262.86		991.379		0.21575	1.67206	7.82093	0.701187	0	0.809061	0	0	2.64293	0.431499	2.75081	0.161812	1.13269	0	9.2233	15.6419	1.24056	11.3808	0.0539374	0	0	0	0	0.0539374	0	0	0.0539374	8.7918	1.34844	1.83387	0.0539374	0.0539374	3.34412	0.647249	0.485437
339-U1387B	339-U1387B-25X-4, 103-105	U1387	B	25	X	4	103	105	229.13	252.38	263.11		992.084		0.286065	1.47119	6.25255	0.653862	0.0408664	1.63465	0.326931	0	1.38946	0	3.59624	0.204332	0.89906	0	4.7405	14.6302	1.63465	12.0964	0	0	0	0.0408664	0	0	0	0	0	8.13241	1.02166	1.26686	0	0.490396	3.75971	0.408664	0
339-U1387B	339-U1387B-25X-4, 127-129	U1387	B	25	X	4	127	129	229.37	252.62	263.35		992.76		0.477834	1.69896	6.84895	0	0.637112	1.14149	0	0	0.424741	0	0	0.159278	0	0	2.76082	13.3793	2.60154	19.8036	0	0	0	0	0	0	0	0	0.106185	12.5299	0.0530926	0.265463	0.0530926	0.106185	2.9201	1.27422	0.0530926
339-U1387B	339-U1387B-25X-5, 2-4	U1387	B	25	X	5	2	4	229.62	252.87	263.6		993.464		0	6.1176	0.248011	1.24005	0.248011	4.10251	0	0	0	0	0.0826702	0.330681	0	0	0.0826702	6.53095	0.826702	24.8837	0	0	0	0	0	0	0	0	0.0826702	18.3528	0.744032	0	0.826702	0	0.0826702	0.0826702	0.0826702
339-U1387B	339-U1387B-25X-5, 27-29	U1387	B	25	X	5	27	29	229.87	253.12	263.85		994.168		0	4.37624	1.07985	1.53453	0.113669	1.96078	0	0	0.0568343	0	0.568343	0.341006	0.0568343	0	0.0568343	10.9122	0.738846	26.4848	0	0	0	0	0	0	0	0	0.568343	17.9028	0.0568343	0.454675	3.29639	0.113669	0.454675	0.795681	0
339-U1387B	339-U1387B-25X-5, 52-54	U1387	B	25	X	5	52	54	230.12	253.37	264.1		994.872		0	4.98824	0.188235	1.12941	0	1.17647	0	0.0470588	0.376471	0	0.0470588	0.0470588	0	0	0.470588	10.3529	3.57647	28.3294	0	0	0	0	0	0	0	0	0.376471	15.3882	0.752941	1.92941	0.752941	0.0470588	0	1.22353	0
339-U1387B	339-U1387B-25X-5, 77-79	U1387	B	25	X	5	77	79	230.37	253.62	264.35		995.576		0	4.08614	0.110436	0.552181	1.49089	0.773054	0	0	1.76698	0	0.552181	0	0	0	0.662617	13.1971	0.331309	24.296	0	0	0	0	0	0	0	0.441745	0.220872	19.6024	0	2.65047	0.165654	0.0552181	0	0	0.0552181
339-U1387B	339-U1387B-25X-5, 100-102	U1387	B	25	X	5	100	102	230.6	253.85	264.58		996.224		0	2.40883	0.033456	0.568752	0	1.23787	0	0	1.10405	0	0.066912	0	0.033456	0.033456	0.568752	8.33055	0.234192	29.0064	0	0	0	0	0	0	0	0	0	14.2857	1.10405	0.535296	0.16728	0	0	0.535296	0
339-U1387B	339-U1387B-25X-5, 127,5-129,5	U1387	B	25	X	5	127.5	129.5	230.875	254.125	264.855		997.013		0	2.3662	0.028169	0.676056	0.084507	0.056338	0.225352	6.87324	0	0.225352	0.028169	0.056338	0	0	0.28169	6.73239	0.732394	29.7746	0	0	0	0	0	0	0	0	0.056338	15.493	0.028169	0.28169	0.338028	0	0	0.56338	0.929577
339-U1387B	339-U1387B-25X-6, 5,5-7,5	U1387	B	25	X	6	5.5	7.5	231.155	254.405	265.135		997.802		0	4.67188	0.963275	0.38531	0.0963275	1.50512	0	0	6.59843	0	0	0	0	0.0481638	0.240819	17.0981	1.92655	22.2998	0.38531	0	0	0	0	0	0	0	0.0481638	10.4034	0.0481638	0	0.0481638	0.0481638	0	0	0.144491
339-U1387B	339-U1387B-25X-6, 26-28	U1387	B	25	X	6	26	28	231.36	254.61	265.34		998.365		0	0.405351	2.25645	0	0.229699	0.351304	0.0135117	0	5.08039	0	0.0135117	0	0	0	0.0405351	9.74193	1.0404	28.4286	0	0	0	0	0	0	0	0	0.0135117	6.86394	0.216187	0	0.364816	0	0	0.486421	0.216187
339-U1387B	339-U1387B-25X-6, 53-55	U1387	B	25	X	6	53	55	231.63	254.88	265.61		999.125		0	0.403599	2.01799	0	0.269066	0.714706	0	0	10.6281	0	0.538132	0	0	0.0672665	0.134533	13.8569	0.739931	24.8213	0	0	0	0	0	0	0	0	0.0672665	11.9062	0	0.269066	3.69966	0	0	0.269066	0
339-U1387B	339-U1387B-25X-6, 77-79	U1387	B	25	X	6	77	79	231.87	255.12	265.85		999.801		0	1.66167	1.7309	0.0692361	0.623125	0.0692361	0	0	13.6857	0	0	0.0461574	0.0230787	0	1.20009	6.69282	0.138472	32.4486	0	0	0	0	0	0	0	0	0	7.3621	0	0.0461574	2.63097	0.0230787	0.946227	0.507731	0.0692361
339-U1387B	339-U1387B-25X-6, 103-105	U1387	B	25	X	6	103	105	232.13	255.38	266.11		1000.53		0	3.74891	0.523104	1.91805	0.610288	9.67742	1.39494	0.174368	18.6574	0	1.13339	0	1.39494	0	6.19006	8.89276	1.30776	8.02092	0	0	0	0.174368	0	0	0	0	0	5.40541	0.43592	0	1.56931	0.174368	1.56931	1.30776	0.697472
339-U1387B	339-U1387B-25X-6, 125-127	U1387	B	25	X	6	125	127	232.35	255.6	266.33		1001.26		0	4.00712	1.02404	0	0.0445236	0.601069	0.712378	0	10.374	0	0.0445236	0.0890472	2.13713	0	8.28139	5.92164	4.29653	4.45236	0.0445236	0	0	0	0	0	0	0	0	4.63045	0	1.42476	0	0	0.534283	0.934996	0.756901
339-U1387A	339-U1387A-26X-1, 29-31	U1387	A	26	X	1	29	31	228.29	252.9	266.57		1002.22		0	12.8776	3.60085	0.244126	0.183094	2.50229	0	0.0610314	7.93409	0	1.09857	0	0.793409	0	11.1077	5.79799	1.49527	0.488251	0.183094	0.0610314	0.244126	0	0	0.244126	0.244126	0	0	5.73695	0.732377	0.976503	0.122063	0	2.80745	0.0610314	0.549283
339-U1387A	339-U1387A-26X-1, 51-53	U1387	A	26	X	1	51	53	228.51	251.76	266.79		1003.11		0.0622859	11.8343	10.7755	0.498287	0.809717	5.82373	0	0	2.11772	0	1.99315	0	0.0622859	0	12.5818	6.78916	1.80629	0	0.498287	0	0	0	0	0	0	0	0	5.23201	1.55715	1.12115	1.18343	0	0.809717	0.249144	1.55715
339-U1387A	339-U1387A-26X-1, 77-79	U1387	A	26	X	1	77	79	228.77	253.38	267.05		1004.15		0.0940734	14.6284	5.73848	0.376294	0.235183	4.09219	0	0	3.24553	0	1.26999	0	0.235183	0	11.9944	11.6181	1.74036	0	0	0	0	0	0	0.0470367	0	0	0.376294	4.75071	0.752587	1.78739	0.470367	0.0470367	1.03481	0.14111	0.188147
339-U1387A	339-U1387A-26X-1, 104-106	U1387	A	26	X	1	104	106	229.04	253.65	267.32		1005.23		0	18.2559	5.70071	2.51103	0.0678656	2.51103	0.542925	0.135731	2.98609	0	2.91822	0.475059	0.135731	0	9.77265	7.15982	1.15372	1.62878	0	0	0	0.0678656	0.135731	0.271463	0	0	0	6.04004	1.62878	0.882253	0.542925	0	2.71463	0.746522	0.542925
339-U1387A	339-U1387A-26X-1, 127-129	U1387	A	26	X	1	127	129	229.27	253.88	267.55		1006.15		0	8.34455	13.0552	0.807537	0.807537	3.34231	0	0	7.76133	0	3.49933	0.13459	0.269179	0.0448632	12.2925	5.24899	0.919695	0	0	0	0	0	0	0	0	0	0	0.897263	0	0.448632	1.83939	0	0.807537	1.25617	0.538358
339-U1387A	339-U1387A-26X-2, 3-5	U1387	A	26	X	2	3	5	229.53	254.14	267.81		1007.2		0.0854336	10.2947	11.7898	5.16873	0.0427168	1.62324	0.384451	0	9.05596	0	0.598035	0.0427168	1.23879	0	7.56087	8.54336	1.62324	1.70867	0	0	0	0	0	0	0	0	0	3.63093	0.683469	0.811619	1.45237	0.897053	2.43486	0.256301	0.683469
339-U1387A	339-U1387A-26X-2, 25,5-27,5	U1387	A	26	X	2	25.5	27.5	229.755	254.365	268.035		1008.12		0	5.75281	8.21573	1.77978	0.0539326	2.57079	0.28764	0	0.413483	16.1079	0.647191	0	0	0	9.34831	6.92135	1.06966	3.86517	0	0	0	0	0	0	0	0	0	3.88315	0.0179775	0.395506	0.898876	0	1.61798	0	1.94157
339-U1387A	339-U1387A-26X-2, 52,5-54,5	U1387	A	26	X	2	52.5	54.5	230.025	254.635	268.305		1009.2		0	2.60901	3.18084	0.0178699	0.0178699	2.91279	0	0.0714796	7.68406	0.0178699	0.0714796	0.160829	0.178699	0.107219	7.95211	10.8292	2.59114	2.91279	0.0178699	0.0178699	0	0	0	0	0	0.571837	0	8.89921	1.17941	0.696926	1.25089	0	0.911365	0.625447	2.39457
339-U1387A	339-U1387A-26X-2, 75-77	U1387	A	26	X	2	75	77	230.25	254.86	268.53		1010.18		0	3.13789	9.11612	0	0.0270508	0.940015	0.432813	0.0270508	8.11524	0.0270508	0.595117	0.135254	0.324609	0.243457	3.24609	8.03408	0.784473	2.19111	0.0541016	0	0	0	0	0	0	0	0	6.65449	1.78535	0.946778	0.730371	0	1.54189	0.0541016	0.946778
339-U1387A	339-U1387A-26X-2, 102-104	U1387	A	26	X	2	102	104	230.52	255.13	268.8		1011.39		0.0189627	8.17294	0.113776	0.341329	0.0189627	0.862805	0.303404	0	7.31962	0	1.61183	0.0948137	2.71167	1.00503	4.74068	10.2968	3.2047	2.14279	0.341329	0	0	0	0	0	0	0.0189627	0	4.47521	1.87731	1.25154	0.0948137	0	1.42221	0.360292	1.9342
339-U1387A	339-U1387A-26X-2, 126-128	U1387	A	26	X	2	126	128	230.76	255.37	269.04		1012.46		0.0167483	1.70833	8.20667	0.0167483	0.0502449	0.146548	0	6.43135	0.117238	0.552694	0.602939	0.602939	0.267973	5.61069	5.12498	2.21078	2.07679	0.569443	0.0334966	0	0	0	0.0167483	0	0	0	0	5.5102	1.60784	1.62459	0.569443	0	0.0669933	0.569443	1.12214
339-U1387A	339-U1387A-26X-3, 5-7	U1387	A	26	X	3	5	7	231.05	255.66	269.33		1013.76		0.064704	8.57328	1.42349	0.582336	0.032352	2.19994	0.517632	0	9.89971	0	2.74992	0	0.64704	0.097056	8.57328	12.7467	5.20867	5.75865	0	0	0	0	0	0	0	0	0.064704	3.81753	0	1.13232	0	0	1.77936	1.94112	1.6176
[truncated: 94 more columns]
