# Supplementary material for: Environmental changes at the seafloor of the Faro drift (Gulf of Cadiz) during the transition from the Early to the Middle Pleistocene
Source: Copernicus journal article supplement (doi:10.5194/jm-45-117-2026), 2026-01-30
Supplement: Supplementary file [file jm-45-117-2026-supplement-title-page.pdf › jm-45-117-2026-supplement-title-page.pdf]

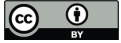

*Supplement of*

**Environmental changes at the seafloor of the Faro drift (Gulf of Cadiz) during the transition from the Early to the Middle Pleistocene**

**Giulia Silveira Molina et al.**

*Correspondence to:* Giulia Silveira Molina ([giuliamolina@gmail.com](mailto:giuliamolina@gmail.com))

- [jm-45-117-2026-supplement-title-page.pdf](#)
- [Supplementary Material 1 - S1.pdf](#)
- [Supplementary material 2 - S2.xlsx](#)

The copyright of individual parts of the supplement might differ from the article licence.
